# Supplementary material for: Effects of Protein Supplementation Combined with Exercise Intervention on Frailty Indices, Body Composition, and Physical Function in Frail Older Adults
Source: PubMed Central journal article supplement (PMC6315527; doi:10.3390/nu10121916), 2018-12-04
Supplement: nutrients-10-01916-s001.pdf [file nutrients-10-01916-s001.pdf]

**Table S1. Database search formulas**

| <b>Data base</b> | <b>Search terms for query</b>                                                                               |
|------------------|-------------------------------------------------------------------------------------------------------------|
| <b>Pubmed</b>    |                                                                                                             |
| #1               | (((frailty/) OR frail) OR elderly) OR order adults                                                          |
| #2               | [(nursing home) OR (institution)] residents                                                                 |
| #3               | (((progressive resistance training) OR resistance exercise) OR strength training) OR strengthening exercise |
| #4               | (((weight training) OR weight lifting/) OR weighted exercise                                                |
| #5               | multicomponent exercise                                                                                     |
| #6               | (physical activity exercise) OR function training                                                           |
| #7               | [(whey protein) Or (amino-acid) OR (leucine)] supplement                                                    |
| #8               | [(diet) OR (nutrient)] intervention                                                                         |
| #9               | [(nutrient) OR (nutrition)] supplement                                                                      |
| #10              | (#1) OR 2                                                                                                   |
| #11              | (((#3) OR #4) OR #5) OR #6                                                                                  |
| #12              | ((#7) OR #8) OR #9                                                                                          |
| #13              | ((#10) AND #11) AND #12                                                                                     |

**Physiotherapy Evidence Database (PEDro)**

Method: clinical trial

Abstract &amp; Title:

|    |                            |
|----|----------------------------|
| #1 | frail elderly              |
| #2 | frailty                    |
| #3 | resistance training        |
| #4 | strengthening exercise     |
| #5 | multicomponent exercise    |
| #6 | physical activity exercise |
| #7 | protein supplement         |
| #8 | whey protein supplement    |

(continued)

**Table S1. (continued)**

| <b>Data base</b>                         | <b>Search terms for query</b>                                                                            |
|------------------------------------------|----------------------------------------------------------------------------------------------------------|
| <b>Excerpta Medica dataBASE (EMBASE)</b> |                                                                                                          |
| #1                                       | frailty                                                                                                  |
| #2                                       | frail                                                                                                    |
| #3                                       | elderly                                                                                                  |
| #4                                       | Older adults                                                                                             |
| #5                                       | ('nursing'/exp OR nursing) AND ('home'/exp OR home)                                                      |
| #6                                       | 'institutional care'                                                                                     |
| #7                                       | #1 OR #2 OR #3 OR #4 OR #5 OR #6                                                                         |
| #8                                       | Resistance AND training OR exercise                                                                      |
| #9                                       | strength AND training OR exercise                                                                        |
| #10                                      | strengthening exercise                                                                                   |
| #11                                      | multicomponent AND exercise                                                                              |
| #12                                      | physical AND activity AND exercise AND training                                                          |
| #13                                      | function training                                                                                        |
| #14                                      | #8 OR #9 OR #10 OR #11 OR #12 OR #13                                                                     |
| #15                                      | whey protein supplement                                                                                  |
| #16                                      | whey protein                                                                                             |
| #17                                      | leucine                                                                                                  |
| #18                                      | nutrition AND supplement                                                                                 |
| #19                                      | nutrient AND supplement                                                                                  |
| #20                                      | #15 OR #16 OR #17 OR #18 OR #19                                                                          |
| #33                                      | #7 AND #14 AND #20                                                                                       |
| #34                                      | #33 AND [randomized controlled trial]/lim AND ([article]/lim OR [article in press]/lim) AND [humans]/lim |
| <b>Cochrane Library Database</b>         |                                                                                                          |
| #1                                       | frailty                                                                                                  |
| #2                                       | frail elderly                                                                                            |
| #3                                       | resistance training                                                                                      |
| #4                                       | strengthening exercise                                                                                   |
| #5                                       | multicomponent exercise                                                                                  |
| #6                                       | physical activity exercise                                                                               |
| #7                                       | protein supplement                                                                                       |
| #8                                       | #1 OR #2                                                                                                 |
| #9                                       | #3 OR #4 OR #5 OR #6                                                                                     |
| #10                                      | #7 AND #8 AND #9                                                                                         |

(continued)

**Table S1. (continued)**

---

| <b>Data base</b> | <b>Search terms for query</b> |
|------------------|-------------------------------|
|------------------|-------------------------------|

---

**China knowledge resource integrated database**

|    |                              |
|----|------------------------------|
| #1 | (frailty) OR (frail elderly) |
| #2 | exercise training            |
| #3 | (whey protein) OR (leucine)  |
| #4 | #1 AND #2 AND #3             |

**Google Scholar**

|    |                                                                   |
|----|-------------------------------------------------------------------|
| #1 | allintitle: frail elderly OR frailty                              |
| #2 | allintitle: resistance training OR strengthening exercise         |
| #3 | allintitle: multicomponent exercise OR physical activity exercise |
| #4 | allintitle: protein supplement OR whey OR leucine                 |

---

**Table S2.** Guidelines of evidence synthesis<sup>a</sup>

| Level of evidence | Criterion of judgment                                                                                                                                                                                                                                                                                                                                                                                                                                         |
|-------------------|---------------------------------------------------------------------------------------------------------------------------------------------------------------------------------------------------------------------------------------------------------------------------------------------------------------------------------------------------------------------------------------------------------------------------------------------------------------|
| Strong            | Provided by consistent <sup>b</sup> statistically significant (or nonsignificant) pooled results in SMD or derived from multiple RCTs, including at least two high-quality RCTs <sup>c</sup>                                                                                                                                                                                                                                                                  |
| Moderate          | Provided by statistically significant results in one high-quality RCT <sup>c</sup><br><b>or</b><br>Provided by inconsistent <sup>b</sup> statistically significant pooled results in SMD or derived from multiple RCTs, including at least one high-quality RCT <sup>c</sup> <b>or</b><br>Provided by consistent <sup>b</sup> statistically significant (or nonsignificant) pooled results in SMD or derived from multiple medium-quality RCTs <sup>c</sup> . |
| Limited           | Provided by statistically significant results in one medium-quality RCT <sup>c</sup> <b>or</b><br>Provided by inconsistent <sup>b</sup> statistically significant pooled results in SMD or derived from multiple medium-quality RCTs <sup>c</sup> .                                                                                                                                                                                                           |
| Conflicting       | Provided by inconsistent <sup>b</sup> statistically nonsignificant results in SMD or derived from multiple RCTs regardless of quality                                                                                                                                                                                                                                                                                                                         |

RCT = randomized controlled trial; SMD = standard mean difference; OR = odds ratio.

<sup>a</sup>Established in accordance with the “best-evidence synthesis,” adapted by Dorrestijn et al [31] from van Tulder’s criteria [32].

<sup>b</sup>Pooled results are considered consistent if no statistically significant heterogeneity ( $I^2$ ,  $P > 0.05$ ) is identified and inconsistent if statistically significant  $I^2$  ( $P < 0.05$ ) is identified.

<sup>c</sup>Methodological quality of a study is rated on the basis of the PEDro score as high ( $\geq 7/10$ ) and medium ( $< 7/10$ ).

**Table S3. Summary of protein supplementation protocols in the included studies**

| Study author (year)<br>[reference number] | Experimental group |                                  |                 |                                                                                                                                  |                                                         | Control group                                                                                                                         |
|-------------------------------------------|--------------------|----------------------------------|-----------------|----------------------------------------------------------------------------------------------------------------------------------|---------------------------------------------------------|---------------------------------------------------------------------------------------------------------------------------------------|
|                                           | Protein sources    | Intake amount (g/d or g/session) | Weekly servings | Supplement type                                                                                                                  | Intake timing                                           | Source of supplement                                                                                                                  |
| Beck 2016 [41]                            | Protein            | 18 g /session                    | 2               | Nutritional drinks in different flavors (125 ml/serving; 14.4 g protein/100 mL)                                                  | After exercise training session                         | No nutrition supplement                                                                                                               |
| Beck 2008 [26]; 2010 [42]                 | Protein            | 7 g/d                            | 7               | Chocolate (1.3 g protein/serving); Hot chocolate (5.7 g protein/serving) or a milk-based oral supplement (6.9 g protein/serving) | Daily in the afternoon and between meals in the evening | No placebo supplement; Normal nutritional care, including oral supplements                                                            |
|                                           | Milk protein       | 3 g/session                      | 2               | Cream and cocoa milk (3.1 g of protein/100 g); Gratin-diets were provided for residents with chewing and swallowing problems.    | After exercise training session                         |                                                                                                                                       |
| Bonnefoy 2003 [43]                        | Proteins           | 30 g/d (2 servings/d)            | 14              | Nutritional energy drinks (4 different flavors; 15 g protein/serving)                                                            | Daily at 10:00 AM and 16:00 PM                          | Placebo supplement with an identical packaging containing neither energy and protein nor vitamins and minerals (4 different flavors). |
| Carlsson 2011 [44]                        | Milk protein       | 7.4 g /session                   | 2–3             | Milk-based protein-enriched drink (7.4 g protein/serving)                                                                        | After exercise training session                         | Placebo drink (0.2 g protein/serving)                                                                                                 |
| Chin A Paw 2001 [45]                      | Proteins           | 20 g/d                           | 7               | 1 dairy product (100g of vanilla custard and fruit yogurt, 75g of vanilla fruit soft curd cheese)                                | Daily diet                                              | Placebo supplement                                                                                                                    |

*Continued*

**Table S3. Continued.**

| Study author (year)<br>[reference number] | Experimental group         |                                  |                 |                                                                                                                   | Control group                               |                                                                                |
|-------------------------------------------|----------------------------|----------------------------------|-----------------|-------------------------------------------------------------------------------------------------------------------|---------------------------------------------|--------------------------------------------------------------------------------|
|                                           | Protein sources            | Intake amount (g/d or g/session) | Weekly servings | Supplement type                                                                                                   | Intake timing                               | Source of supplement                                                           |
| Corcoran 2017 [46]                        | Milk protein               | 20 g /session                    | 7               | Nutrition supplement drink (20 g protein/serving)                                                                 | After the completion of each exercise class | No nutrition supplement                                                        |
| de Jone 1999 [47]                         | Proteins                   | 20 g/d                           | 7               | 100-g servings of dairy products (vanilla custard, two types of fruit yogurt and 75 g of cheese curd with fruits) | Daily diet                                  | Regular dairy products (highest 15% of the concentration in enriched products) |
| Dirks 2017 [48]                           | Milk protein               | 30 g/d (2 servings/d)            | 14              | Beverage protein drink (15 g protein/serving)                                                                     | twice daily after breakfast and after lunch | Placebo supplement (7.13 g lactose and 0.42 g calcium per serving)             |
| Fiatarone 1994 [49]                       | Soy protein                | 40.8 g/d                         | 7               | Liquid supplement (240 ml/serving, 17% protein per serving)                                                       | Once daily in the evening                   | Placebo supplement                                                             |
| Franzke 2015 [50]                         | Whey protein, Leucine, EAA | 20.7 g/d                         | 9               | Liquid supplement (20.7 g protein/serving; 19.7 g whey protein, 3 g leucine, > 10 g EAA)                          | Once daily in the morning                   | No nutrition supplement                                                        |
|                                           |                            | 41.4 g/session                   | 2               | Nutrient supplement drink (20.7 g protein/serving; 3 g leucine, > 10 g EAA)                                       | After exercise training session             | No nutrition supplement                                                        |
| Hofmann 2016 [51]                         | Leucine, EAA               | 20.7 g/d                         | 2               | Nutrient supplement drink (20.7 g protein/serving; 3 g leucine, > 10 g EAA)                                       | Once daily in the morning                   | No nutrition supplement                                                        |
|                                           |                            | 41.4 g/session                   | 2               | Nutrient supplement drink (20.7 g protein/serving; 3 g leucine, > 10 g EAA)                                       | After exercise training session             | No nutrition supplement                                                        |
| Ikeda 2016 [52]                           | EAA                        | 6 g/session                      | 2               | 6-g amino acid supplement drink (500 mg of amino acids per 1 g, 3 g EAA/serving)                                  | Within 10 min before exercise               | Placebo supplement (6 g of maltodextrin)                                       |

*Continued*

**Table S3. Continued.**

| Study author (year)<br>[reference number] | Experimental group  |                                  |                 |                                                                                                | Control group                                                                         |                                                         |
|-------------------------------------------|---------------------|----------------------------------|-----------------|------------------------------------------------------------------------------------------------|---------------------------------------------------------------------------------------|---------------------------------------------------------|
|                                           | Protein sources     | Intake amount (g/d or g/session) | Weekly servings | Supplement type                                                                                | Intake timing                                                                         | Source of supplement                                    |
| Imaoka 2016 [53]                          | Proteins            | 4.1 g/d                          | 7               | Isocal jelly PCF (4 g protein/serving);<br>Nutrition supplement (0.1 g protein/serving)        | Jelly: daily after lunch;<br>Supplement: daily after dinner                           | No nutrition supplement                                 |
| Kim 2015 [54]                             | Milk protein (MFGM) | 22 g/d                           | 7               | Pill-form yogurt-flavored supplement (21.5% protein, 167 mg of MFGM per pill, 6 pills/serving) | Daily in the morning                                                                  | Placebo supplement (milk powder, 26.3% protein)         |
|                                           |                     | 22 g/session                     | 2               |                                                                                                | Before activities                                                                     |                                                         |
| Niccoli 2017 [55]                         | Whey protein        | 24 g/d                           | 7               | An oral dietary product                                                                        | Daily; hot cereal (9 g at breakfast); milk products (7.5 g/drink at lunch and dinner) | Standard care                                           |
| Oesen 2015 [56]                           | Leucine, EAA        | 20.7 g/d;                        | 9               | Nutrient supplement drink (20.7 g protein/serving: 3 g leucine, > 10 g EAA)                    | Once daily in the morning;                                                            | No nutrition supplement                                 |
|                                           |                     | 41.4 g/session                   | 2               | Nutrient supplement drink (20.7 g protein/serving: 3 g leucine, > 10 g EAA)                    | After exercise on the training session day                                            | No nutrition supplement                                 |
| Rosendahl 2006 [57]                       | Milk protein        | 7.4 g/session                    | 2–3             | Nutrient supplement drink (7.4 g protein, 15.7 g carbohydrate)                                 | After exercise on the training session day                                            | Placebo supplement (0.2 g protein, 10.8 g carbohydrate) |

*Continued*

**Table S3. Continued.**

| Study author (year)<br>[reference number] | Experimental group |                                  |                  |                                                                                                          |                                                                                | Control group                                                                      |
|-------------------------------------------|--------------------|----------------------------------|------------------|----------------------------------------------------------------------------------------------------------|--------------------------------------------------------------------------------|------------------------------------------------------------------------------------|
|                                           | Protein sources    | Intake amount (g/d or g/session) | Weekly servings  | Supplement type                                                                                          | Intake timing                                                                  | Source of supplement                                                               |
| Tieland 2012 [58]                         | Milk protein       | 30 g/d                           | 14 (2 serving/d) | A 250-mL protein-supplemented beverage (vanilla flavored milk protein concentrate; 15 g protein/serving) | Daily, 1 beverage consumed after breakfast and 1 beverage consumed after lunch | Placebo supplement (7.1 g lactose, 0.4 g calcium)                                  |
| Trabal 2015 [59]                          | Leucine            | 10 g/d                           | 15               | 5 g leucine (about 40 g of whey protein) per serving                                                     | Twice daily after main meals (lunch and dinner)                                | Placebo supplement (maltodextrin)                                                  |
| Yamada 2015 [60]                          | Protein (BCAA)     | 10 g/d                           | 7                | Protein supplement (10.0 g of protein with BCAA per serving)                                             | Daily                                                                          | No nutrition supplement                                                            |
| Zak 2009 [61]                             | Protein            | 32 g/d                           | 7                | A liquid supplement drink (200 ml/serving; 16% protein)                                                  | Once daily, shortly before the commencement of their routine exercise regimen  | Placebo supplement (200 ml/serving; 97.5% carbohydrates, 1% lipids, 1.5% proteins) |

BCAA, branched chain amino acids; EAA, essential amino acids; MFGM, milk fat globule membrane



**Table S4. Summary of exercise training protocols in the included studies**

| Study author (year) [reference number] | Experimental group                                                                                                                       |                                                                  |                                                        |                                                                                     |                                                                                               |                                    |                                                                                                                                                                                        |                                                                                                                                                      |                             |                        | Control group              |                                                                                                                                                   |
|----------------------------------------|------------------------------------------------------------------------------------------------------------------------------------------|------------------------------------------------------------------|--------------------------------------------------------|-------------------------------------------------------------------------------------|-----------------------------------------------------------------------------------------------|------------------------------------|----------------------------------------------------------------------------------------------------------------------------------------------------------------------------------------|------------------------------------------------------------------------------------------------------------------------------------------------------|-----------------------------|------------------------|----------------------------|---------------------------------------------------------------------------------------------------------------------------------------------------|
|                                        | Flexibility/ROM/stretching exercises                                                                                                     | Muscle strengthening ( progressive RET)                          |                                                        |                                                                                     |                                                                                               | Endurance (AET)                    | Balance                                                                                                                                                                                | Functional mobility exercises                                                                                                                        | Training time (min/session) | Frequency ( session/w) | Intervention duration (wk) | Control activity                                                                                                                                  |
| Training part                          |                                                                                                                                          | Resistance set                                                   | Intensity                                              | Training volume                                                                     |                                                                                               |                                    |                                                                                                                                                                                        |                                                                                                                                                      |                             |                        |                            |                                                                                                                                                   |
| Beck 2016 [41]                         | None                                                                                                                                     | Upper and lower extremity exercises and weight bearing exercises | Light weights, theraband or body resistance            | Moderate                                                                            | NR                                                                                            | None                               | Included; No detailed information.                                                                                                                                                     | Transfers, bed mobility, gait/wheelchair training, stair training.                                                                                   | 30–45                       | 2                      | 11                         | Standard care from nutrition coordinators, physiotherapists, and occupational therapists.                                                         |
| Beck 2008 [26]; 2010 [42]              | Included as warm-up exercise.                                                                                                            | Upper and lower extremity functional strength training           | Weight bearing                                         | Moderate                                                                            | NR                                                                                            | None                               | Dynamic balance training (weight shifts in the sitting and standing positions, walking on different surfaces, and ball bounces)                                                        | None                                                                                                                                                 | 45–60                       | 2                      | 11                         | Standard care from nutrition coordinators, physiotherapists, and occupational therapists.                                                         |
| Bonnefoy 2003 [43]                     | Flexibility exercise, included as warm-up exercise.                                                                                      | Upper and lower extremity exercises                              | Dumbbells, elastic bands, and weight bearing exercises | NR                                                                                  | Started with one set of five repetitions and progressed to three sets of ten.                 | None                               | Included; No detailed information.                                                                                                                                                     | Group training (ball-games) incorporated with strengthening and standing exercises.                                                                  | 60                          | 3                      | 36                         | NR                                                                                                                                                |
| Carlsson 2011 [44]                     | None                                                                                                                                     | Lower limbs                                                      | Weight bearing                                         | High (8-12 RM); 18-15 RM for the first two weeks (build-up period)                  | 12 repetitions; 2 sets (at least two lower-limb strength exercises and two balance exercises) | None                               | Balance exercises while standing and walking                                                                                                                                           | Functional weight-bearing exercise                                                                                                                   | 45                          | 2–3                    | 13                         | Theme-based sitting activities (watching films, reading, singing, conversation)                                                                   |
| Chin A Paw 2001 [45]                   | Cool-down period consisted of stretching and relaxation activities (eg, finger and wrist rolls, shoulder rolls, reaching, leg stretches) | Lower extremity                                                  | Wrist and ankle weights (450g each)                    | Moderate; 6–8 on a 10-point RPE scale (1 = very, very light, 10 = very, very heavy) | NR                                                                                            | Included; No detailed information. | Coordination; motor behavior in games and cooperative activities (ie, throwing, catching a ball) while standing up and sitting down on a chair, musical chairs, and team pursuit races | Group training; Walking (warm-up activities); Motor actions (reaching, throwing, catching, kicking, chair stands, bending down, toe and heel raises) | 45                          | 2                      | 17                         | Social program (lectures, social activities, crafts; once every 2 weeks for 90 minutes); Home visits (a supply of fresh food products; off weeks) |

*Continued*

**Table S4. Continued.**

| Study author (year) [reference number] | Flexibility/ROM/stretching exercises  | Experimental group                                                                |                                               |                                       |                                                                                                                                                                                                                                                         |                                                                                                                                                       |                                                                                                                               |                                                                  |                             |                        |                            | Control group                                                                                                  |
|----------------------------------------|---------------------------------------|-----------------------------------------------------------------------------------|-----------------------------------------------|---------------------------------------|---------------------------------------------------------------------------------------------------------------------------------------------------------------------------------------------------------------------------------------------------------|-------------------------------------------------------------------------------------------------------------------------------------------------------|-------------------------------------------------------------------------------------------------------------------------------|------------------------------------------------------------------|-----------------------------|------------------------|----------------------------|----------------------------------------------------------------------------------------------------------------|
|                                        |                                       | Muscle strengthening ( progressive RET)                                           |                                               |                                       |                                                                                                                                                                                                                                                         | Endurance (AET)                                                                                                                                       | Balance                                                                                                                       | Functional mobility exercises                                    | Training time (min/session) | Frequency ( session/w) | Intervention duration (wk) | Control activity                                                                                               |
| Training part                          | Resistance set                        | Intensity                                                                         | Training volume                               |                                       |                                                                                                                                                                                                                                                         |                                                                                                                                                       |                                                                                                                               |                                                                  |                             |                        |                            |                                                                                                                |
| Corcoran 2017 [46]                     | None                                  | Lower extremity (chair stands, leg extensions, knee flexions, and hip abductions) | Ankle weight (0 to 5 pounds/leg); body weight | RPE: somewhat hard to moderately hard | 10 repetitions; 2 sets                                                                                                                                                                                                                                  | Marching or dancing (progressed in duration (15 to 30 minutes),); speed of movements based on music cadence (90 beats/minute (bpm), 100 bpm, 110 bpm) | tandem stands, crossover walks, toe stands, vestibular-based exercises (standing on one leg, turning one’s head side to side) | None                                                             | 60                          | 3                      | 24                         | An attention-control program (once/week discussion group for 60 minutes)                                       |
| de Jone 1999 [47]                      | Included; No detailed information.    | Lower extremity                                                                   | Weights, elastic bands                        | Progressively increasing intensity    | NR                                                                                                                                                                                                                                                      | Included; No detailed information.                                                                                                                    | Coordination; exercise using balls and ropes                                                                                  | walking, stooping, chair stands; increasing daily activity level | 45                          | 2                      | 17                         | Social program (attention; once every 2 weeks for 90 minutes)                                                  |
| Dirks 2017 [48]                        | Cycle ergometer (warm-up & cool-down) | Whole body                                                                        | Leg press and leg extension machine           | 50%–75% 1-RM                          | Initial session: 10-15 repetitions; leg press and leg extension machine (4 sets); 3 sets on the lateral pulldown, vertical row, chest press, and pec (pectoral) dec. Advance (4 wks later): 75% of 1RM for 8 repetitions on leg press and leg extension | None                                                                                                                                                  | None                                                                                                                          | None                                                             | NR                          | 2                      | 24                         | The same exercise program as exponential group did.                                                            |
| Fiatarone 1994 [49]                    | None                                  | Lower extremity                                                                   | Leg press and leg extension machine           | 80% 1-RM                              | 6-9 sec/repetition; 3 sets, 8 repetitions                                                                                                                                                                                                               | None                                                                                                                                                  | None                                                                                                                          | None                                                             | 45                          | 3                      | 10                         | Placebo activities: walking, calisthenics in seated position, board games, crafts, concerts, group discussions |

*Continued*

**Table S4. Continued.**

| Study author (year) [reference number] | Flexibility/ROM/stretching exercises             | Experimental group                                                                                   |                                                   |                          |                                                                                                                  |                                                                      |                                                                           |                                                                                                                                |                                                         |                                                                      |                            | Control group                                                                                                                                                                                                      |
|----------------------------------------|--------------------------------------------------|------------------------------------------------------------------------------------------------------|---------------------------------------------------|--------------------------|------------------------------------------------------------------------------------------------------------------|----------------------------------------------------------------------|---------------------------------------------------------------------------|--------------------------------------------------------------------------------------------------------------------------------|---------------------------------------------------------|----------------------------------------------------------------------|----------------------------|--------------------------------------------------------------------------------------------------------------------------------------------------------------------------------------------------------------------|
|                                        |                                                  | Muscle strengthening ( progressive RET)                                                              |                                                   |                          |                                                                                                                  | Endurance (AET)                                                      | Balance                                                                   | Functional mobility exercises                                                                                                  | Training time (min/session)                             | Frequency ( session/w)                                               | Intervention duration (wk) | Control activity                                                                                                                                                                                                   |
|                                        |                                                  | Training part                                                                                        | Resistance set                                    | Intensity                | Training volume                                                                                                  |                                                                      |                                                                           |                                                                                                                                |                                                         |                                                                      |                            |                                                                                                                                                                                                                    |
| Franzke 2015 [50]                      | None                                             | Whole body: ten exercises for the main muscle groups (legs, back, abdomen, chest, shoulder and arms) | Elastic bands                                     | OMNI-RES > 7 (80% 1-RM)a | Initial phase (first 4 weeks): one set of 15 repetitions; Advance phase (after 5th wk): 2 sets of 15 repetitions | None                                                                 | None                                                                      | None                                                                                                                           | 60                                                      | 2                                                                    | 24                         | RET group: The same as experimental group did. Cognitive training group: memory training and finger dexterity exercises in sitting position.                                                                       |
| Hofmann 2016 [51]                      | None                                             | Whole body: ten exercises for the main muscle groups (legs, back, abdomen, chest, shoulder and arms) | Elastic bands                                     | OMNI-RES > 7 (80% 1-RM)  | Initial phase (first 4 weeks): one set of 15 repetitions; Advance phase (after 5th wk): 2 sets of 15 repetitions | None                                                                 | None                                                                      | None                                                                                                                           | 60                                                      | 2                                                                    | 24                         | Cognitive training group (placebo activity): cognitive tasks (memory training) and coordinative tasks (such as manual dexterity), 2 session/wk; RET control group: The exercise program as experimental group did. |
| Ikeda 2016 [52]                        | 10 min, cool-down                                | Lower extremity                                                                                      | Muscle training machine                           | 30% 1-RM                 | 3 sets, 20 repetitions                                                                                           | 1 set, 10 min; ergometer or a recumbent cross trainer; RPE level: 12 | 1 set, 15 min; balance pad                                                | gait training in the parallel bars                                                                                             | 110                                                     | 2                                                                    | 12                         | The same exercise program as experimental group did.                                                                                                                                                               |
| Imaoka 2016 [53]                       | Group exercise: warm-up and cool-down activities | Upper and lower extremity (Individualized and group exercise)                                        | Elastic bands (Individualized and group exercise) | NR                       | NR                                                                                                               | None                                                                 | Sitting and standing balance exercise (Individualized and group exercise) | Individualized exercise: Transfers, gait, sit-to-stand exercise; Group exercise: sit-to-stand exercise (20 repetitions, 1 set) | Individualized exercise: 20 min; Group exercise: 30 min | Individualized exercise: 2 session/wk; Group exercise: 1 session/wk) | 12                         | Usual care: individualized exercise (20 min, 2 session/wk), group exercise (30 min, 1 session/wk)                                                                                                                  |

*Continued*

**Table S4. Continued.**

| Study author<br>(year) [reference<br>number] | Flexibility/ROM/stretching<br>exercises            | Experimental group                                                                                                                                     |                                                                                                                                                                            |                                                                   |                                                                                                                  |                                                              |                                                                                                                                                                            |                                                                    |                                |                           | Control group                       |                                                                                                                                                                                                                    |
|----------------------------------------------|----------------------------------------------------|--------------------------------------------------------------------------------------------------------------------------------------------------------|----------------------------------------------------------------------------------------------------------------------------------------------------------------------------|-------------------------------------------------------------------|------------------------------------------------------------------------------------------------------------------|--------------------------------------------------------------|----------------------------------------------------------------------------------------------------------------------------------------------------------------------------|--------------------------------------------------------------------|--------------------------------|---------------------------|-------------------------------------|--------------------------------------------------------------------------------------------------------------------------------------------------------------------------------------------------------------------|
|                                              |                                                    | Muscle strengthening ( progressive RET)                                                                                                                |                                                                                                                                                                            |                                                                   |                                                                                                                  | Endurance<br>(AET)                                           | Balance                                                                                                                                                                    | Functional mobility<br>exercises                                   | Training time<br>(min/session) | Frequency<br>( session/w) | Intervention<br>duration<br>(wk)    | Control activity                                                                                                                                                                                                   |
| Training part                                | Resistance set                                     | Intensity                                                                                                                                              | Training<br>volume                                                                                                                                                         |                                                                   |                                                                                                                  |                                                              |                                                                                                                                                                            |                                                                    |                                |                           |                                     |                                                                                                                                                                                                                    |
| Kim 2015 [54]                                | Warm-up (10 min) and cool-down (10 min) activities | Upper and lower extremity (toe raises, heel raises, knee lifts, knee extensions, hip flexions, lateral leg raises, double-arm pull downs, bicep curls) | Elastic bands (progressively from the seated to standing positions such as standing upright behind the chair and holding the back of the chair for stability)              | Moderate (30 min); Borg RPE: 12–14 (60%–80% of 1-RM) <sup>a</sup> | NR                                                                                                               | None                                                         | 20 min; one leg and multidirectional weight shifts                                                                                                                         | Gait (20 min)                                                      | 60                             | 2                         | 12                                  | Exercise control group: the same exercise program as experimental group did.                                                                                                                                       |
| Niccoli 2017 [55]                            | Included                                           | Upper and lower extremity exercises                                                                                                                    | Light weights, theraband, weight bearing                                                                                                                                   | NR                                                                | NR                                                                                                               | Seated bike, arm ergometer and/or ambulating around the unit | Static and dynamic balance training in sitting and standing. Standing balance exercises (unsupported reach, tandem, unipedal stance, tandem walk, agility ladder stepping) | Transfers, bed mobility, gait/wheelchair training, stair training. | NR                             | 7                         | 4 wk (mean length of hospital stay) | Standard care                                                                                                                                                                                                      |
| Oesen 2015 [56]                              | Warm-up (10 min) and cool-down (10 min) activities | Whole body: 1–2 of 10 exercises, mainly involved 6 muscle groups (legs, back, abdomen, chest, shoulder, arms)                                          | Elastic bands (leg extension, hip extension, standing row, chest press, front raise, elbow flexion and extension); body weight (squat, calf lift, bilateral leg lift hold) | 35–40 min; OMNI-RES > 7 (80% 1-RM) <sup>a</sup>                   | Initial phase (first 4 weeks): one set of 15 repetitions; Advance phase (after 5th wk): 2 sets of 15 repetitions | None                                                         | None                                                                                                                                                                       | None                                                               | 60                             | 2                         | 24                                  | Cognitive training group (placebo activity): cognitive tasks (memory training) and coordinative tasks (such as manual dexterity), 2 session/wk; RET control group: The exercise program as experimental group did. |

*Continued*

**Table S4. Continued.**

| Study author<br>(year) [reference<br>number] | Flexibility/ROM/stretching<br>exercises             | Experimental group                                                                                                 |                                                                                                                  |                                                                                                                                       |                                                                                                                                                            |                    |                                                                                                                     |                                                                                                                                                                                                                                  |                                |                                                                  | Control group                    |                                                                                                     |
|----------------------------------------------|-----------------------------------------------------|--------------------------------------------------------------------------------------------------------------------|------------------------------------------------------------------------------------------------------------------|---------------------------------------------------------------------------------------------------------------------------------------|------------------------------------------------------------------------------------------------------------------------------------------------------------|--------------------|---------------------------------------------------------------------------------------------------------------------|----------------------------------------------------------------------------------------------------------------------------------------------------------------------------------------------------------------------------------|--------------------------------|------------------------------------------------------------------|----------------------------------|-----------------------------------------------------------------------------------------------------|
|                                              |                                                     | Muscle strengthening ( progressive RET)                                                                            |                                                                                                                  |                                                                                                                                       |                                                                                                                                                            | Endurance<br>(AET) | Balance                                                                                                             | Functional mobility<br>exercises                                                                                                                                                                                                 | Training time<br>(min/session) | Frequency<br>( session/w)                                        | Intervention<br>duration<br>(wk) | Control activity                                                                                    |
|                                              |                                                     | Training part                                                                                                      | Resistance set                                                                                                   | Intensity                                                                                                                             | Training volume                                                                                                                                            |                    |                                                                                                                     |                                                                                                                                                                                                                                  |                                |                                                                  |                                  |                                                                                                     |
| Rosendahl 2006<br>[57]                       | None                                                | Lower<br>extremity<br>(Step-up onto<br>boxes, heel<br>raises, squat, sit<br>to stand,<br>forward or side<br>lunge) | Body weight,<br>weighted belt<br>(worn around<br>the waist)                                                      | High-intensity<br>(8–12 RM)                                                                                                           | Weighted belt:<br>up to a<br>maximum of 12<br>kg;<br>Body weight:<br>doing deeper<br>squats or doing<br>step-ups onto a<br>higher box                      | None               | Walking over<br>obstacles, on a soft<br>surface, with<br>numerous turns;<br>trunk rotation; side<br>step and return | - After training<br>sessions<br>- Physical tasks<br>regarding daily life<br>activities (e.g.<br>walking, squats, and<br>standing without<br>balance support)<br>- Number: one to four<br>- Frequency: from<br>weekly up to daily | 45                             | 2–3                                                              | 13                               | Included activities while<br>sitting, e.g. watching films,<br>reading, singing, and<br>conversation |
| Tieland 2012 [58]                            | Warm-up (5 min, cycle<br>ergometer)                 | Upper and<br>lower extremity                                                                                       | Leg-extension<br>machines; chest<br>press, lat<br>pulldown, pec<br>deck, and<br>vertical row<br>machines         | Started at 50%<br>of 1-RM (10-15<br>repetitions per<br>set);<br>Progressively<br>increased to<br>75% of 1-RM<br>(8–10<br>repetitions) | 4 sets on the<br>leg-press and<br>leg-extension<br>machines and 3<br>sets on chest<br>press, lat<br>pulldown, pec<br>deck, and<br>vertical row<br>machines | None               | None                                                                                                                | None                                                                                                                                                                                                                             | NR                             | 2                                                                | 24                               | The same exercise<br>program as experimental<br>group did.                                          |
| Trabal 2015 [59]                             | Warm-up (5 min) and<br>cool-down (5 min) activities | Lower<br>extremity (chair<br>squats, leg<br>curls, leg<br>extensions, toe<br>stands, wall<br>push-ups)             | Body weight<br>(exercises were<br>executed while<br>seated or with<br>the use of a<br>chair as a<br>support aid) | 65% of the<br>maximum<br>number of<br>repetitions                                                                                     | Started with 1<br>set of 8<br>repetitions,<br>progressively<br>increased to 2<br>sets of 15<br>repetitions                                                 | None               | side leg raises, back<br>leg raises, hip<br>flexions, and walking<br>heel to toe                                    | None                                                                                                                                                                                                                             | RET: 40<br>min/session         | 4 (3 sessions<br>of RET, 1<br>session of<br>balance<br>training) | 12                               | The same exercise<br>program as experimental<br>group did.                                          |

*Continued*

**Table S4. Continued.**

| Study author<br>(year) [reference<br>number] | Flexibility/ROM/stretching<br>exercises                                                                                                                                                            | Experimental group                                                      |                                                                |                                       |                          |                                                                                         |                                                                           |                                                                                                                                                                                                                   |                                    |                           | Control group                    |                                                      |
|----------------------------------------------|----------------------------------------------------------------------------------------------------------------------------------------------------------------------------------------------------|-------------------------------------------------------------------------|----------------------------------------------------------------|---------------------------------------|--------------------------|-----------------------------------------------------------------------------------------|---------------------------------------------------------------------------|-------------------------------------------------------------------------------------------------------------------------------------------------------------------------------------------------------------------|------------------------------------|---------------------------|----------------------------------|------------------------------------------------------|
|                                              |                                                                                                                                                                                                    | Muscle strengthening ( progressive RET)                                 |                                                                |                                       |                          | Endurance (AET)                                                                         | Balance                                                                   | Functional mobility<br>exercises                                                                                                                                                                                  | Training time<br>(min/session)     | Frequency<br>( session/w) | Intervention<br>duration<br>(wk) | Control activity                                     |
| Training part                                | Resistance set                                                                                                                                                                                     | Intensity                                                               | Training<br>volume                                             |                                       |                          |                                                                                         |                                                                           |                                                                                                                                                                                                                   |                                    |                           |                                  |                                                      |
| Yamada 2015 [60]                             | None                                                                                                                                                                                               | None                                                                    | NA                                                             | NA                                    | NA                       | Pedometer-based walking programs (increase the number of daily steps by 10% each month) | None                                                                      | Pedometer-based walking programs (increase the number of daily steps by 10% each month); The mail-based intervention consisted of motivation for walking followed by goal setting, self-monitoring, and feedback. | NR                                 | 7                         | 24                               | The same exercise program as experimental group did. |
| Zak 2009 [61]a                               | Warm-up [5 min, upper and lower limbs; trunk (initially in an recumbent position, and in a sitting down position on a chair afterwards)];<br>Cool-down (simple breathing and relaxation exercises) | Lower extremity (hip extensors and flexors; knee extensors and flexors) | Elastic resistance bands (four series of resistance exercises) | High-intensity activity (80% of 1-RM) | 3 sets of 10 repetitions | None                                                                                    | Multi-sensory balance training on a ball cushion on top of the chair seat | 10 simple exercises (implemented in an upright sitting position on a standardized chair)                                                                                                                          | 45 (20 min of FOE , 20 min of RET) | 5                         | 7                                | The same RET+FOE program as experimental group did.  |
| Zak 2009 [61]b                               | Warm-up [5 min, upper and lower limbs; trunk (initially in an recumbent position, and in a sitting down position on a chair afterwards)];<br>Cool-down (simple breathing and relaxation exercises) | None                                                                    | NA                                                             | NA                                    | NA                       | Pedal exercises (duration: ca.10 min. with three 30 sec. intervals)                     | Multi-sensory balance training on a ball cushion on top of the chair seat | 10 simple exercises (implemented in an upright sitting position on a standardized chair)                                                                                                                          | 45 (20 min of FOE , 20 min of SE)  | 5                         | 7                                | The same SE+FOE program as experimental group did.   |

<sup>a</sup>Data was estimated based on the previous studies (Ref).

AET, Aerobic exercise training; FOE, functionally-oriented exercise; OMNI-RES, OMNI-Resistance Exercise Scale (0 extremely easy to 10 extremely hard); ROM, range of motion; RM, repetition maximum; RPE, rate of perceived exertion; SE, standard exercise

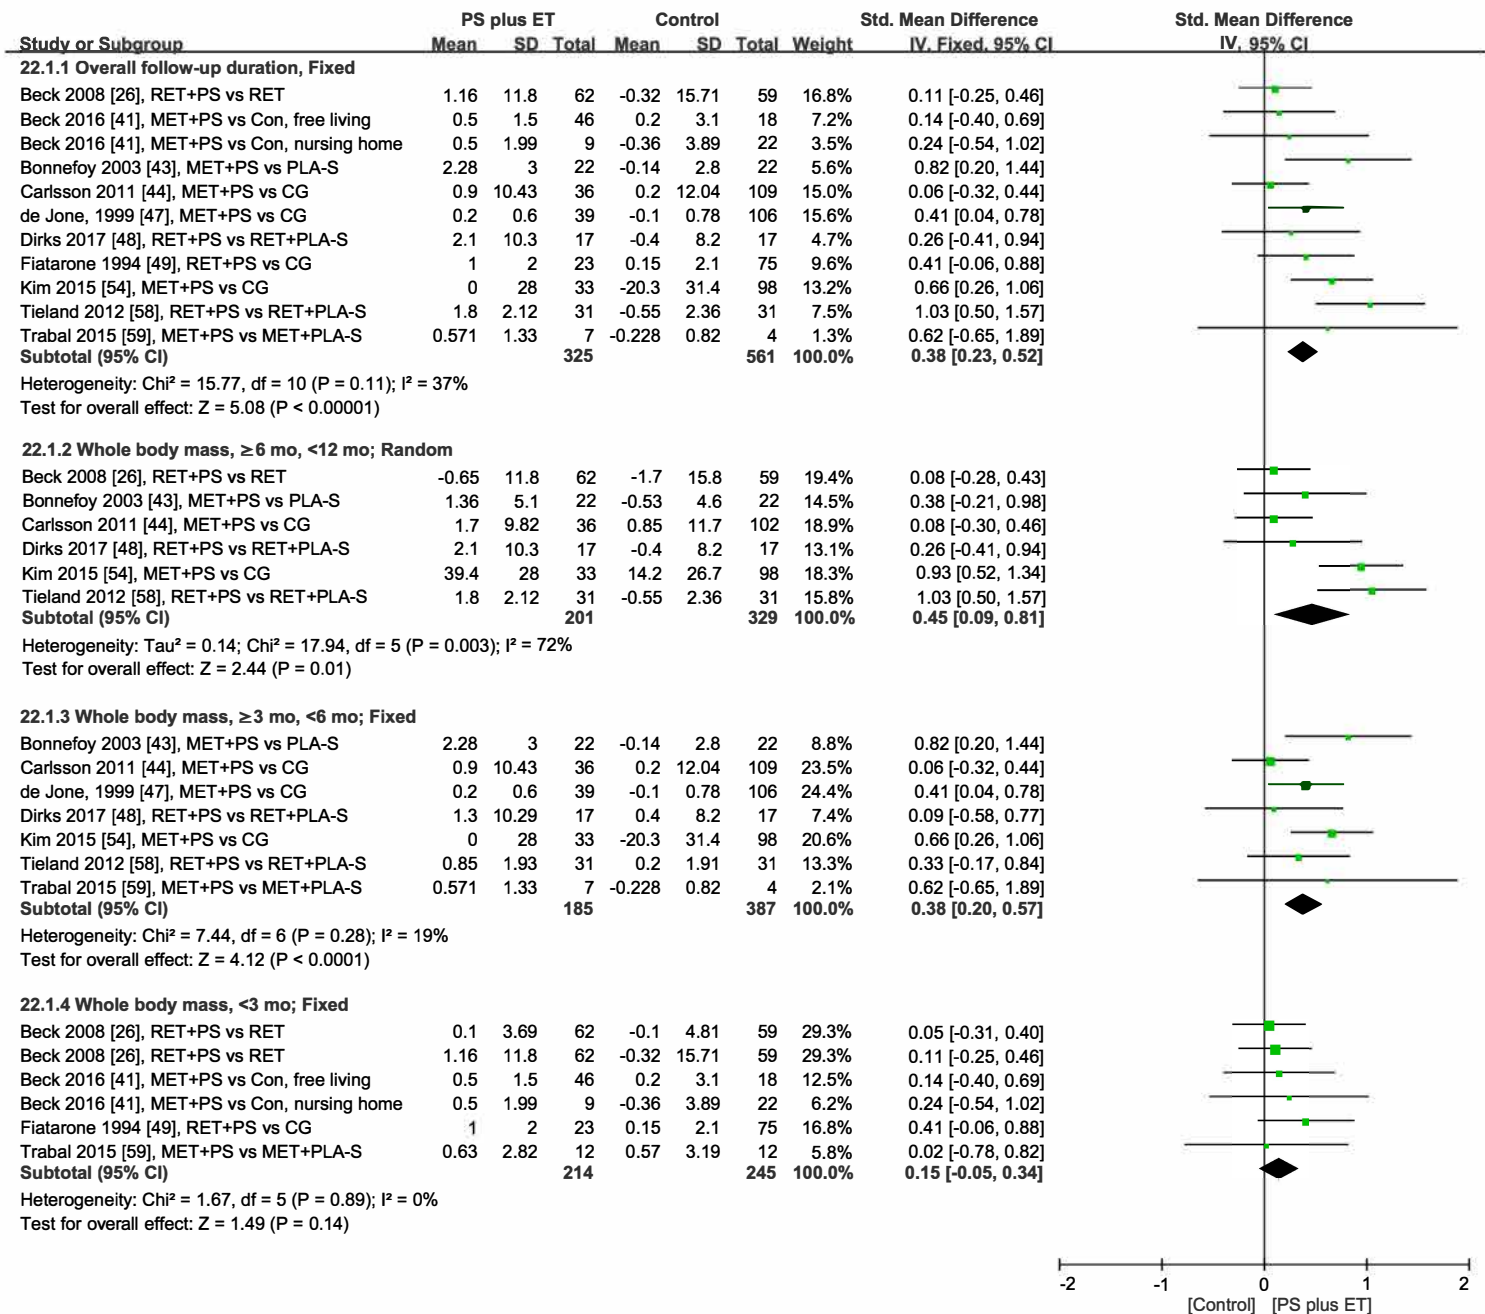

Figure S1. Forest plot summarizing effects of protein supplement (PS) plus exercise training (ET) on total body mass at an overall duration and each follow-up time point. The horizontal line links the lower and upper limits of the 95% CI of this effect. The combined effects are plotted using black diamonds. 95% CI = 95% confidence interval; Fixed = fixed-effects model; Random = random-effects model; Std. = standard; IV = inverse variance; CG = control group; Con = control; MET = multicomponent exercise training; PLA-S, placebo supplement; RET = resistance exercise training.

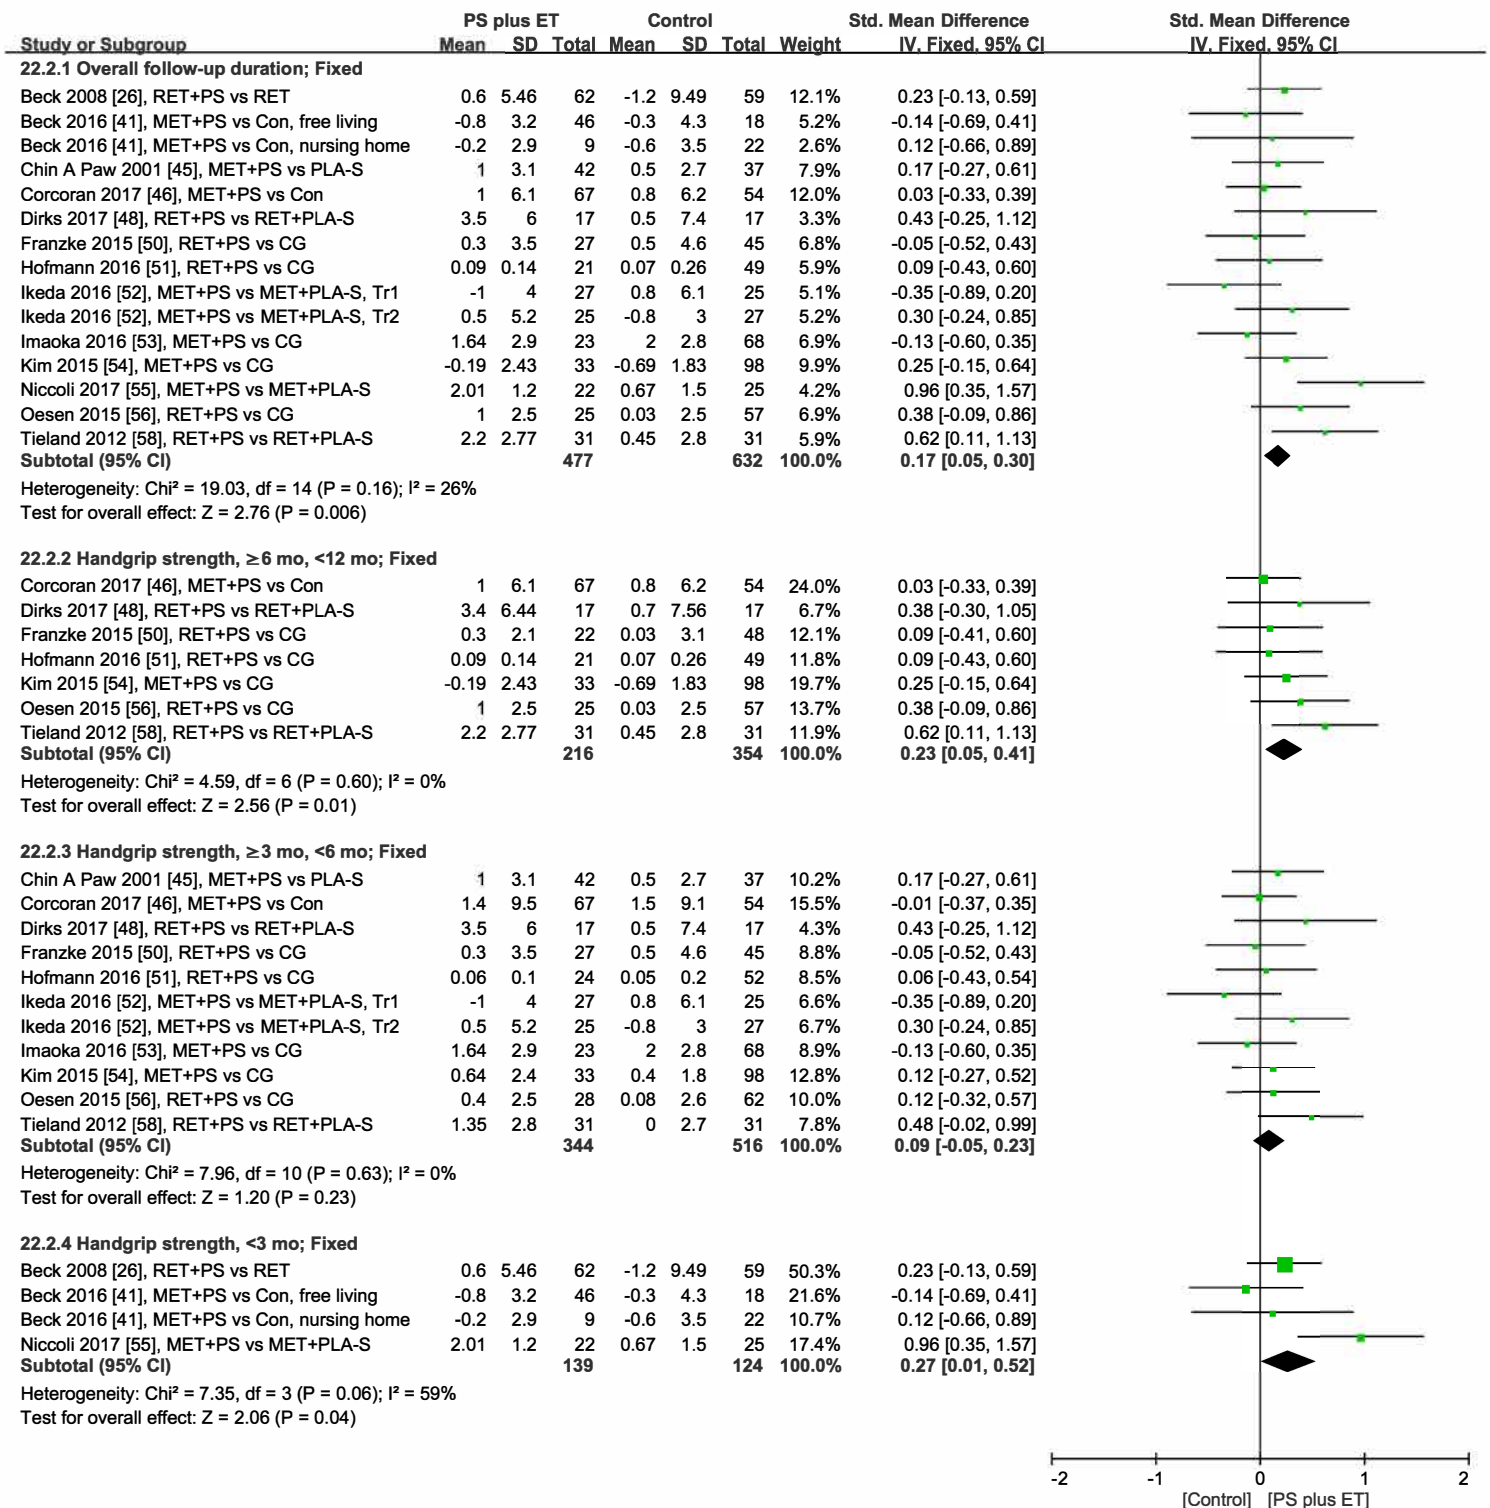

Figure S2. Forest plot summarizing effects of protein supplement (PS) plus exercise training (ET) on handgrip strength at an overall duration and each follow-up time point. The horizontal line links the lower and upper limits of the 95% CI of this effect. The combined effects are plotted using black diamonds. 95% CI = 95% confidence interval; Fixed = fixed-effects model; Std. = standard; IV = inverse variance; CG = control group; Con = control; MET = multicomponent exercise training; PLA-S, placebo supplement; RET = resistance exercise training; Tr = treatment session.



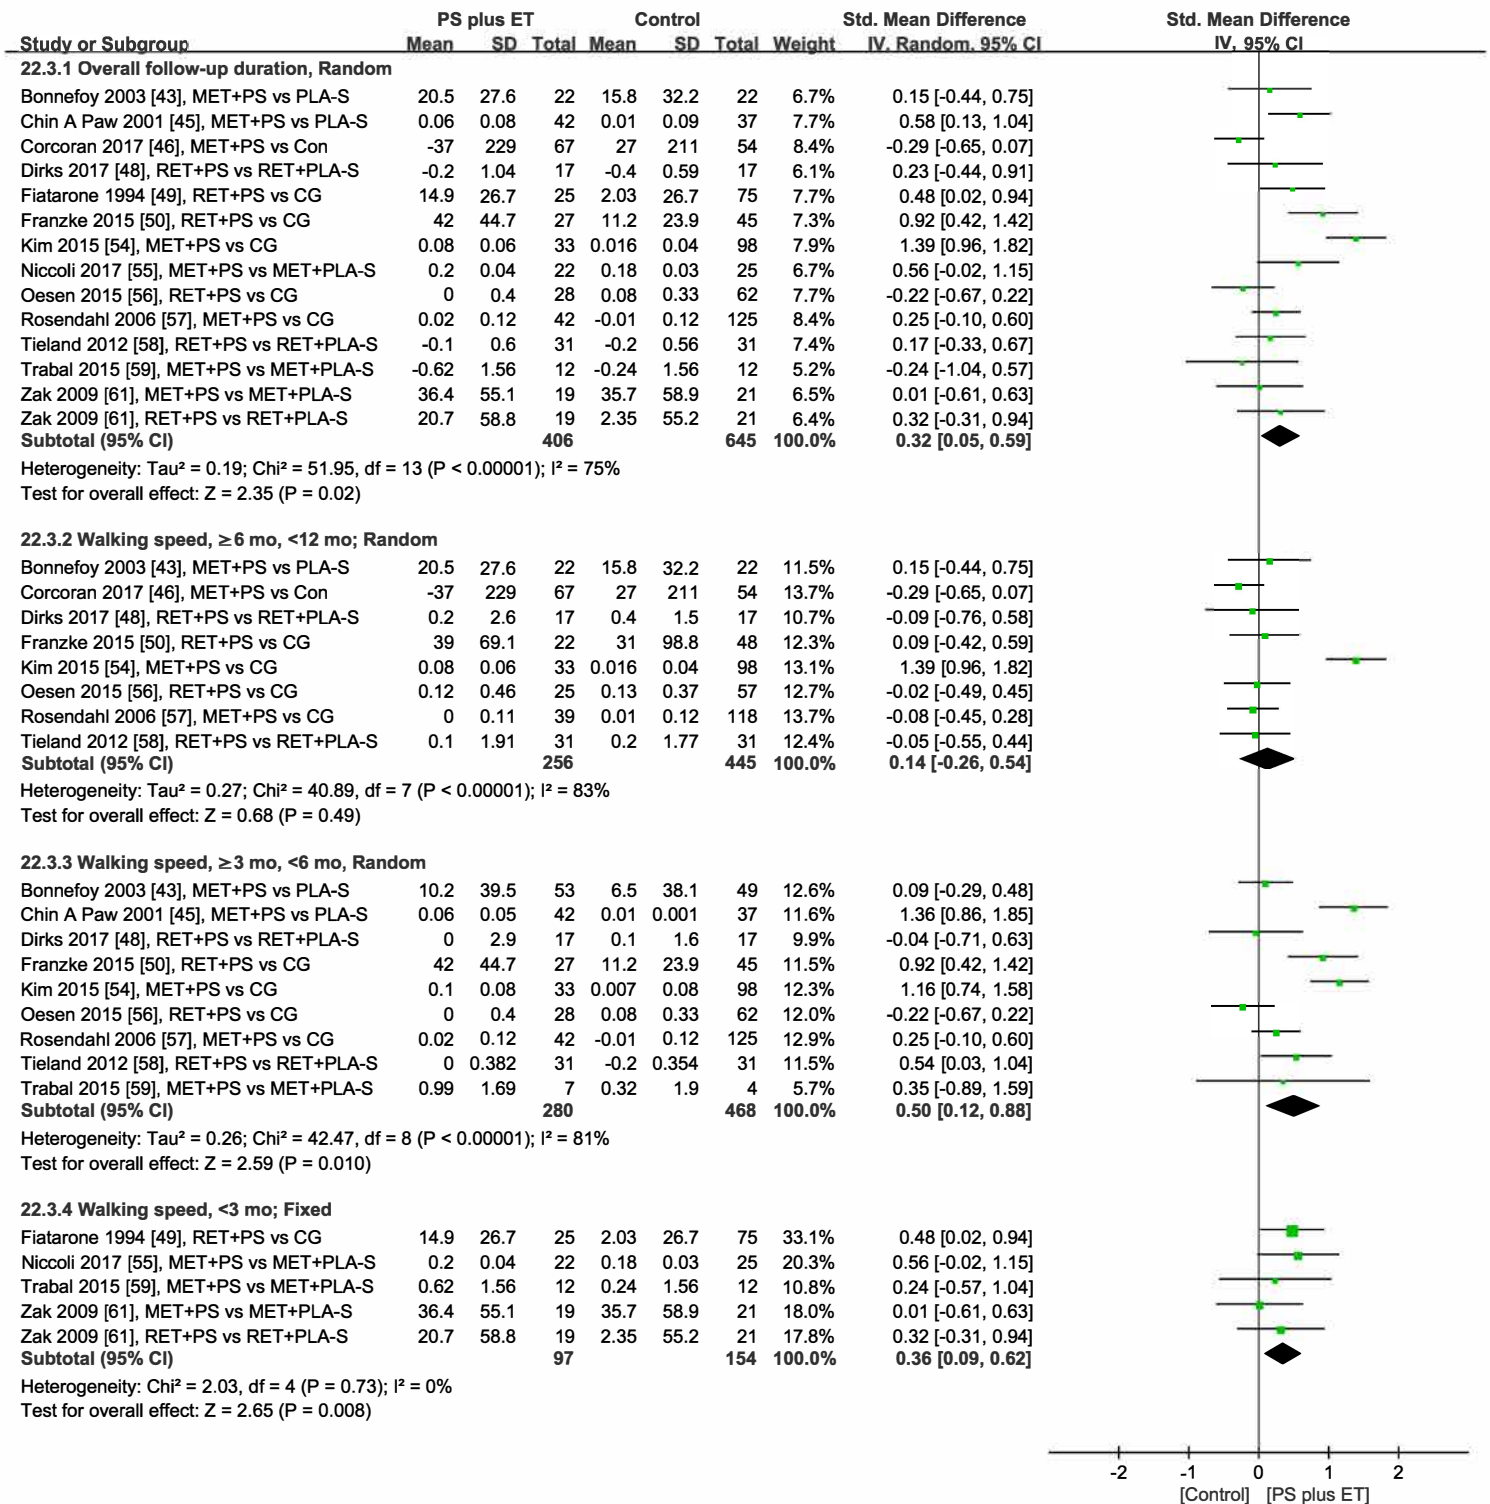

Figure S3. Forest plot summarizing effects of protein supplement (PS) plus exercise training (ET) on walk capability at an overall duration and each follow-up time point. The horizontal line links the lower and upper limits of the 95% CI of this effect. The combined effects are plotted using black diamonds. 95% CI = 95% confidence interval; Fixed = fixed-effects model; Random = random-effects model; Std. = standard; IV = inverse variance; CG = control group; Con = control; MET = multicomponent exercise training; PLA-S, placebo supplement; RET = resistance exercise training.

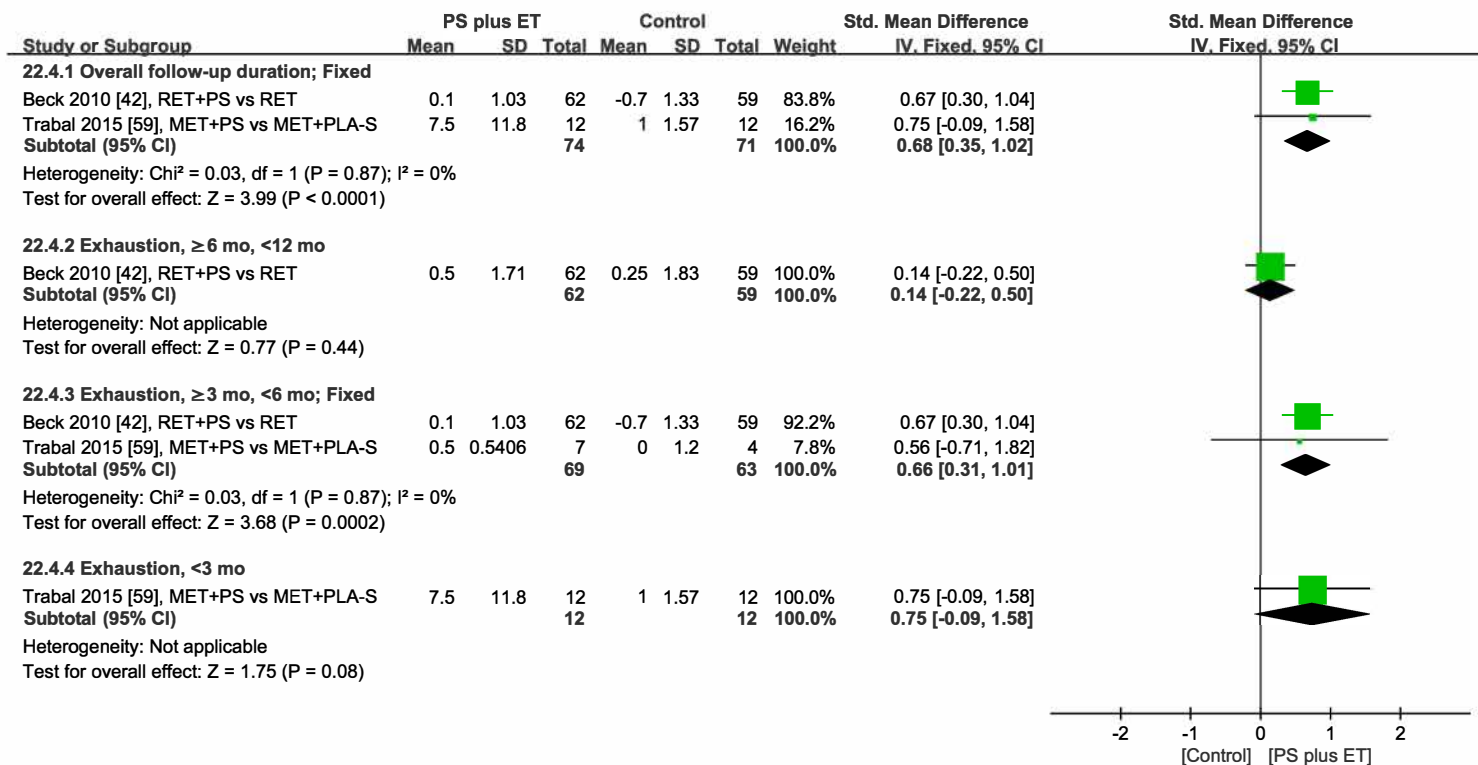

Figure S4. Forest plot summarizing effects of protein supplement (PS) plus exercise training (ET) on exhaustion at an overall duration and each follow-up time point. The horizontal line links the lower and upper limits of the 95% CI of this effect. The combined effects are plotted using black diamonds. 95% CI = 95% confidence interval; Fixed = fixed-effects model; Random = random-effects model; Std. = standard; IV = inverse variance; CG = control group; Con = control; MET = multicomponent exercise training; PLA-S, placebo supplement; RET = resistance exercise training.

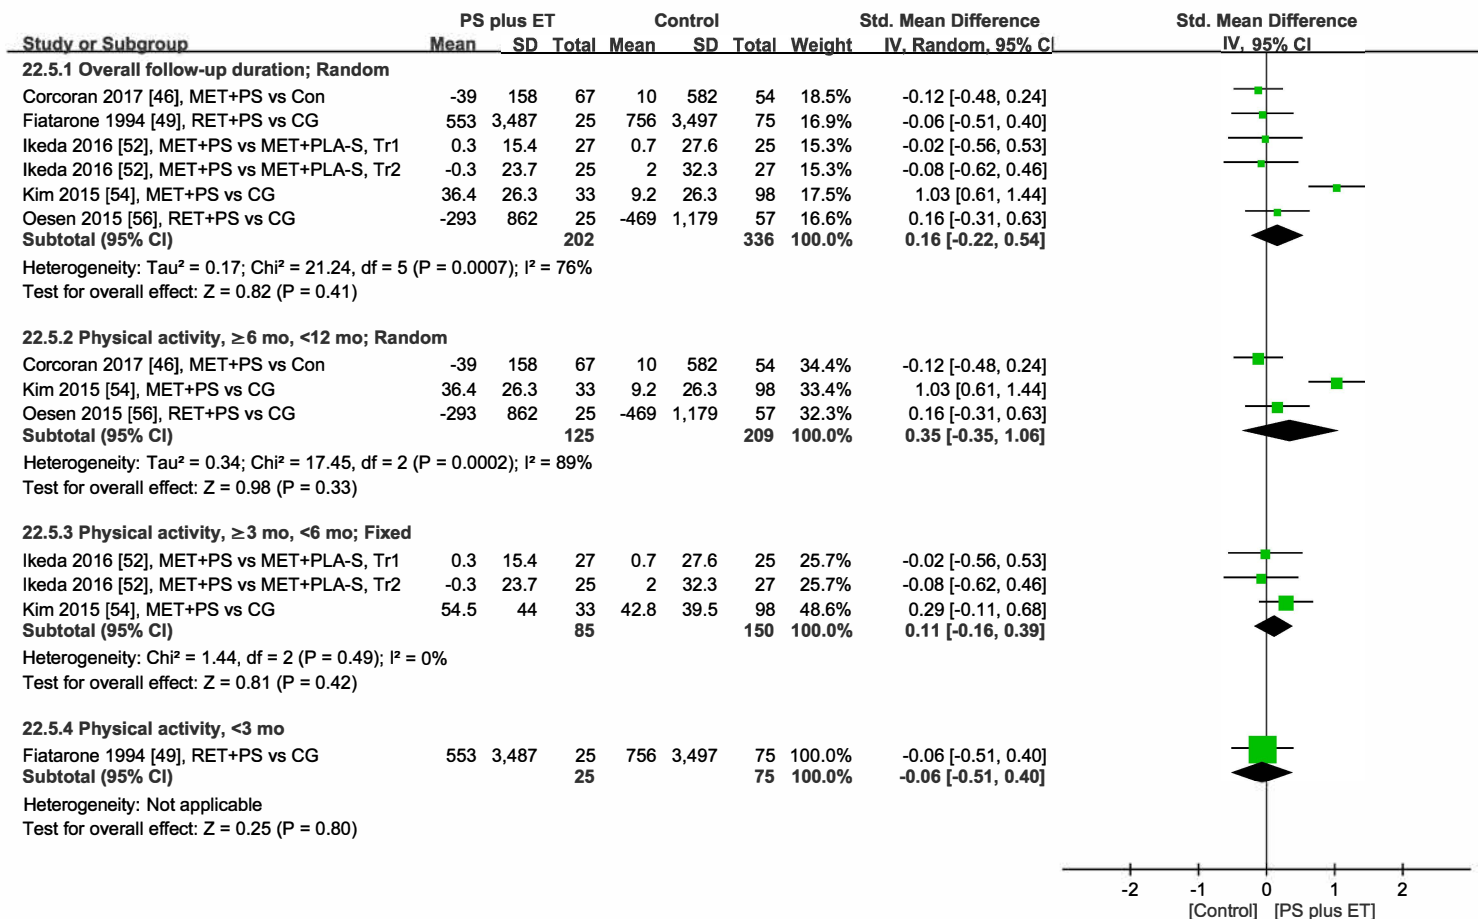

Figure S5. Forest plot summarizing effects of protein supplement (PS) plus exercise training (ET) on physical activity at an overall duration and each follow-up time point. The horizontal line links the lower and upper limits of the 95% CI of this effect. The combined effects are plotted using black diamonds. 95% CI = 95% confidence interval; Fixed = fixed-effects model; Random = random-effects model; Std. = standard; IV = inverse variance; CG = control group; Con = control; MET = multicomponent exercise training; PLA-S, placebo supplement; RET = resistance exercise training; Tr = treatment session.

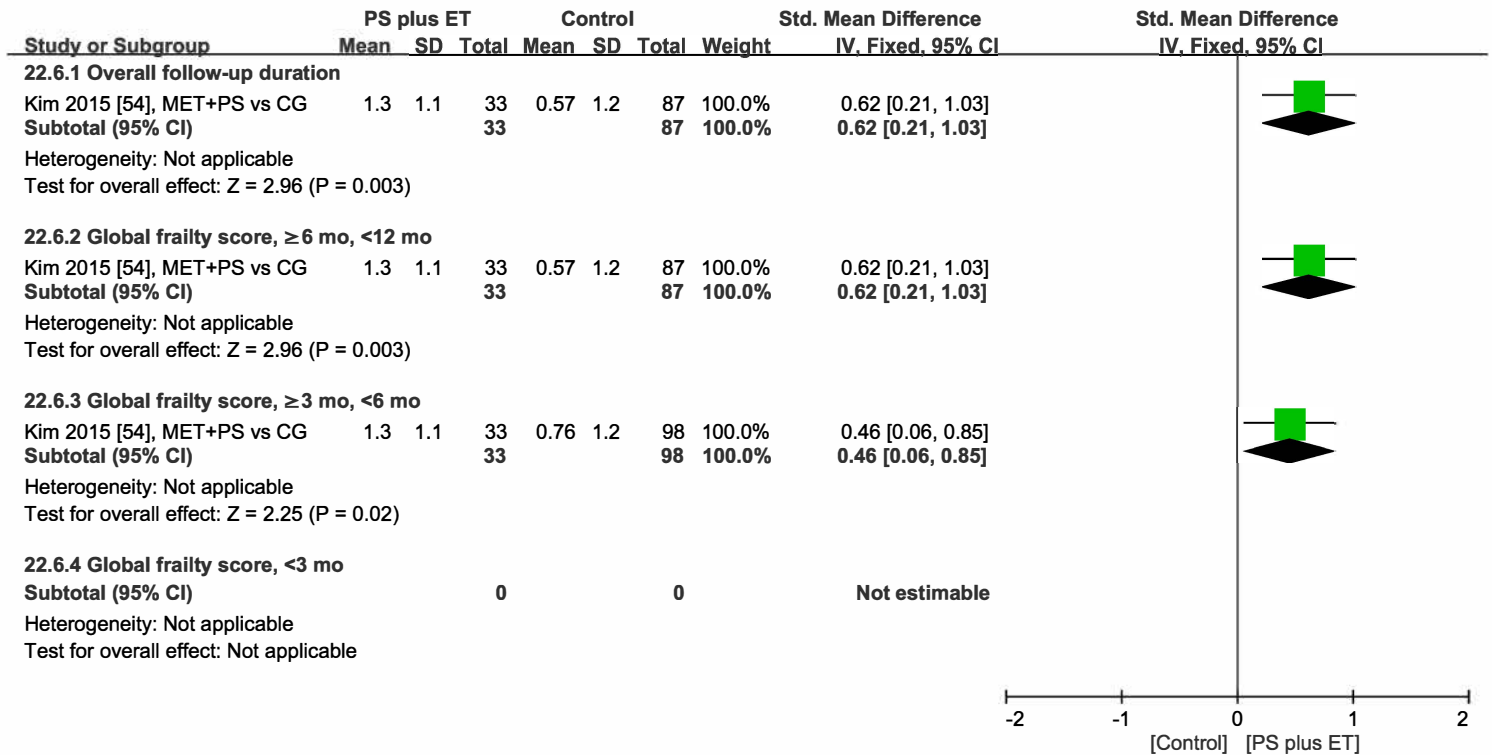

Figure S6. Forest plot summarizing effects of protein supplement (PS) plus exercise training (ET) on global frailty score at an overall duration and each follow-up time point. The horizontal line links the lower and upper limits of the 95% CI of this effect. The combined effects are plotted using black diamonds. 95% CI = 95% confidence interval; Fixed = fixed-effects model; Std. = standard; IV = inverse variance; CG = control group; MET = multicomponent exercise training; PLA-S, placebo supplement; RET = resistance exercise training.

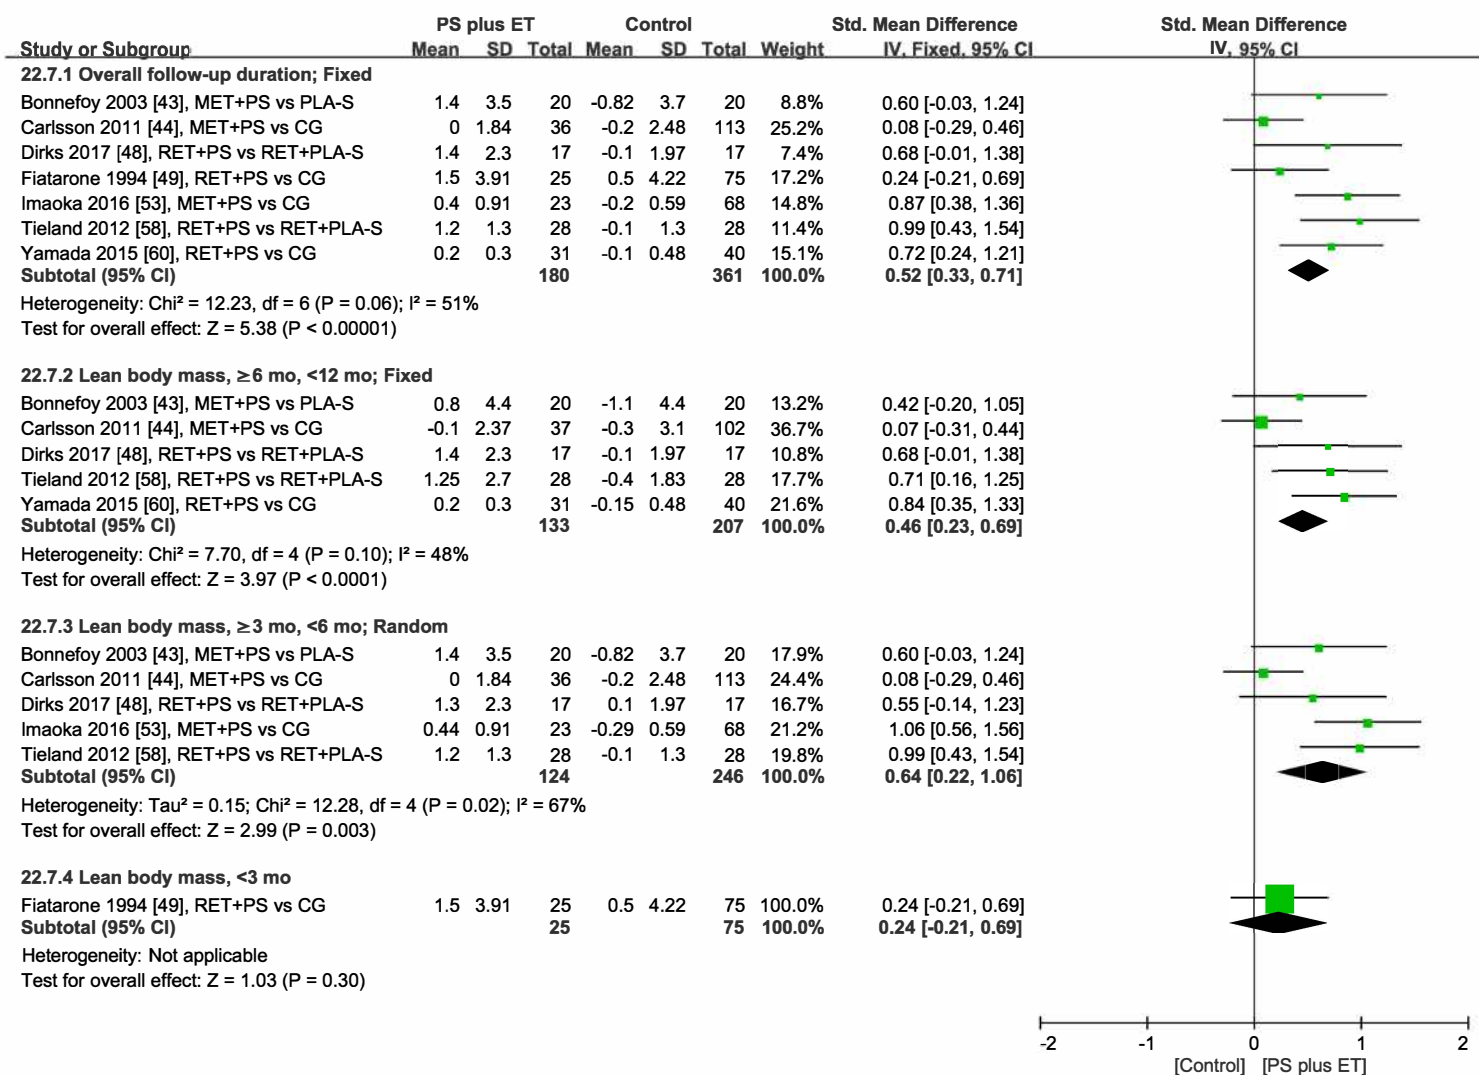

Figure S7. Forest plot summarizing effects of protein supplement (PS) plus exercise training (ET) on lean body mass at an overall duration and each follow-up time point. The horizontal line links the lower and upper limits of the 95% CI of this effect. The combined effects are plotted using black diamonds. 95% CI = 95% confidence interval; Fixed = fixed-effects model; Std. = standard; IV = inverse variance; CG = control group; Con = control; MET = multicomponent exercise training; PLA-S, placebo supplement; RET = resistance exercise training.

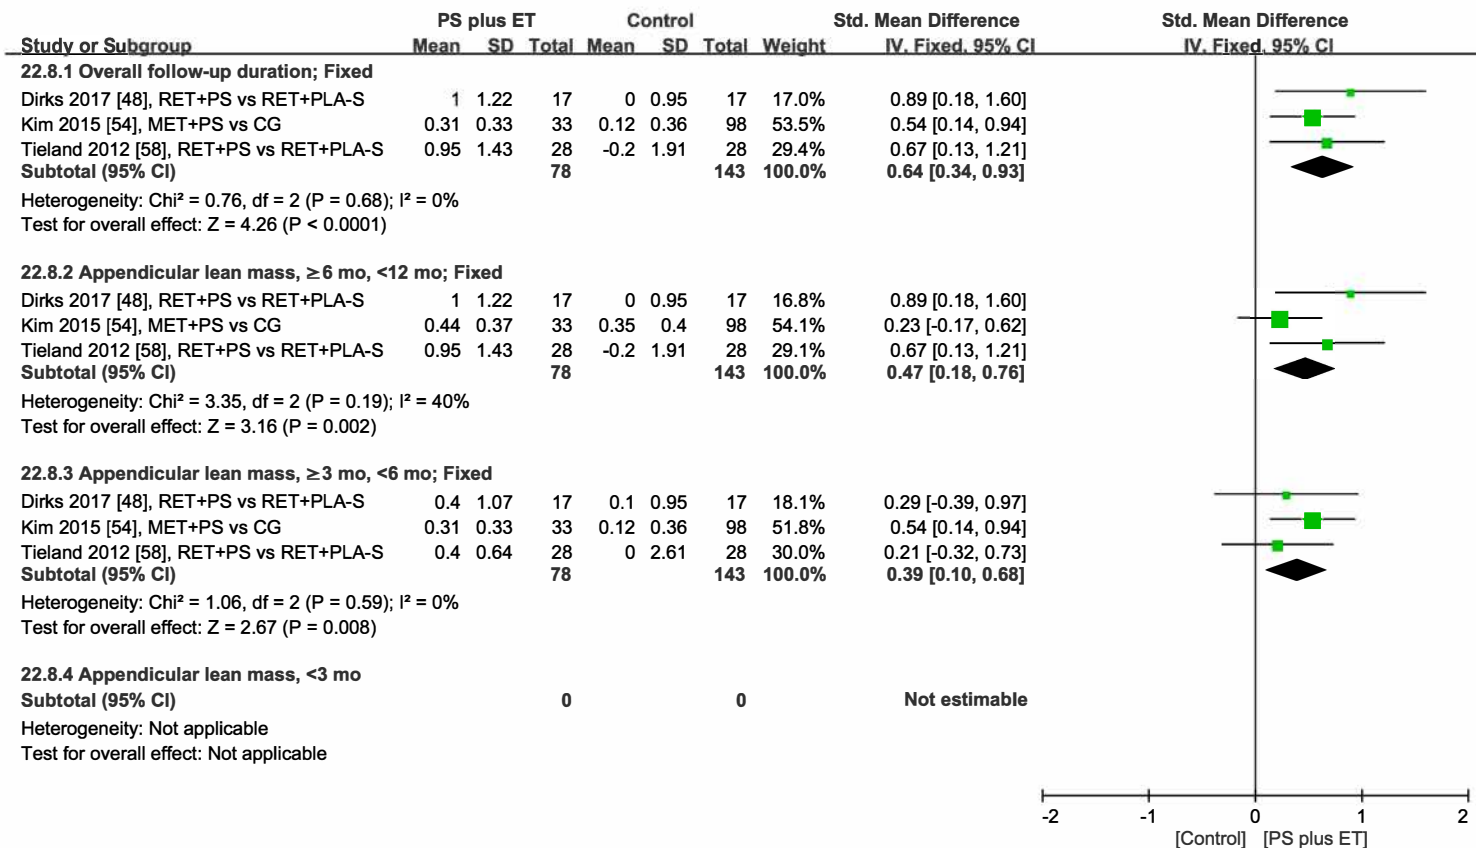

Figure S8. Forest plot summarizing effects of protein supplement (PS) plus exercise training (ET) on appendicular lean mass at an overall duration and each follow-up time point. The horizontal line links the lower and upper limits of the 95% CI of this effect. The combined effects are plotted using black diamonds. 95% CI = 95% confidence interval; Fixed = fixed-effects model; Std. = standard; IV = inverse variance; CG = control group; CogT = cognition training; Con = control; MET = multicomponent exercise training; PLA-S, placebo supplement; RET = resistance exercise training.

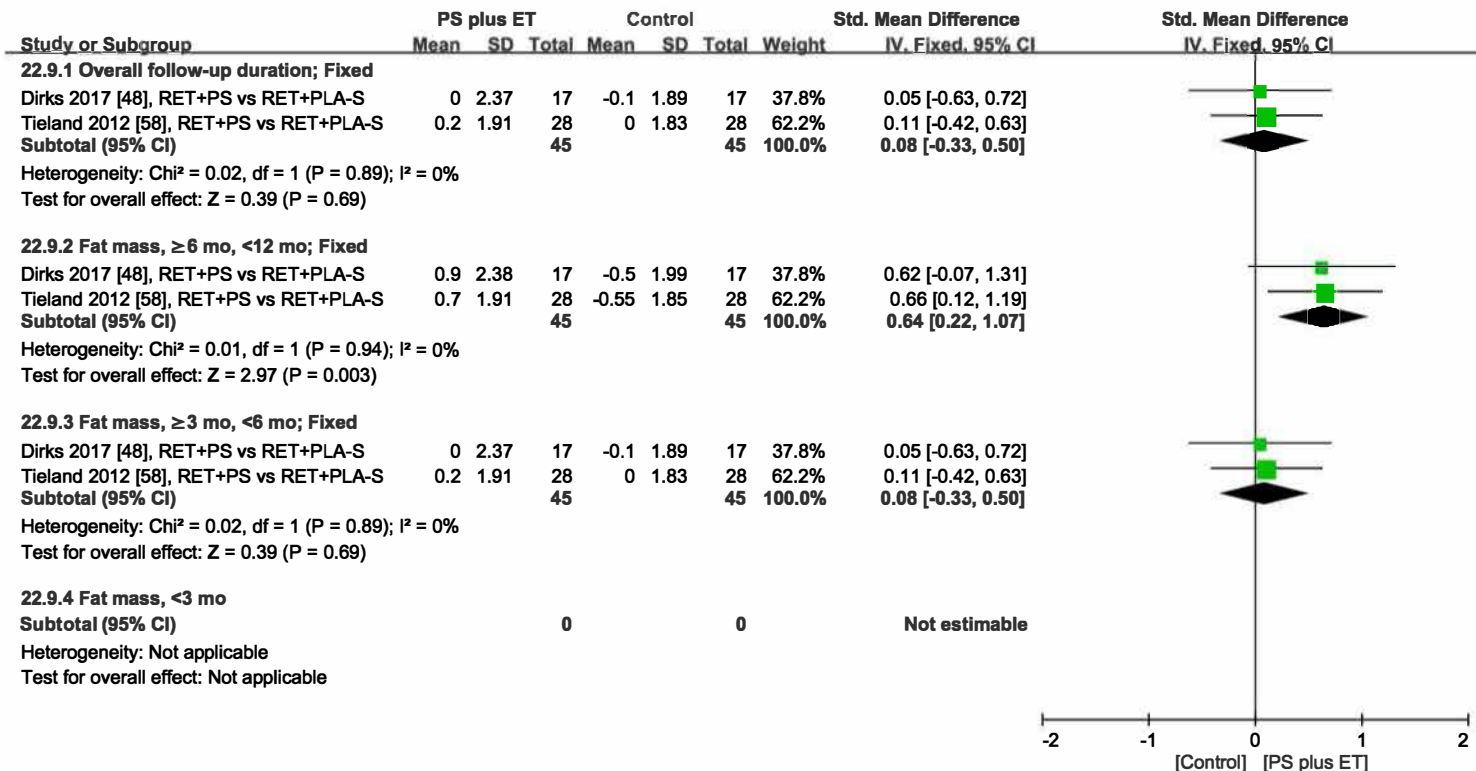

**Figure S9.** Forest plot summarizing effects of protein supplement (PS) plus exercise training (ET) on fat mass at an overall duration and each follow-up time point. The horizontal line links the lower and upper limits of the 95% CI of this effect. The combined effects are plotted using black diamonds. 95% CI = 95% confidence interval; Fixed = fixed-effects model; Std. = standard; IV = inverse variance; CG = control group; Con = control; MET = multicomponent exercise training; PLA-S, placebo supplement; RET = resistance exercise training.

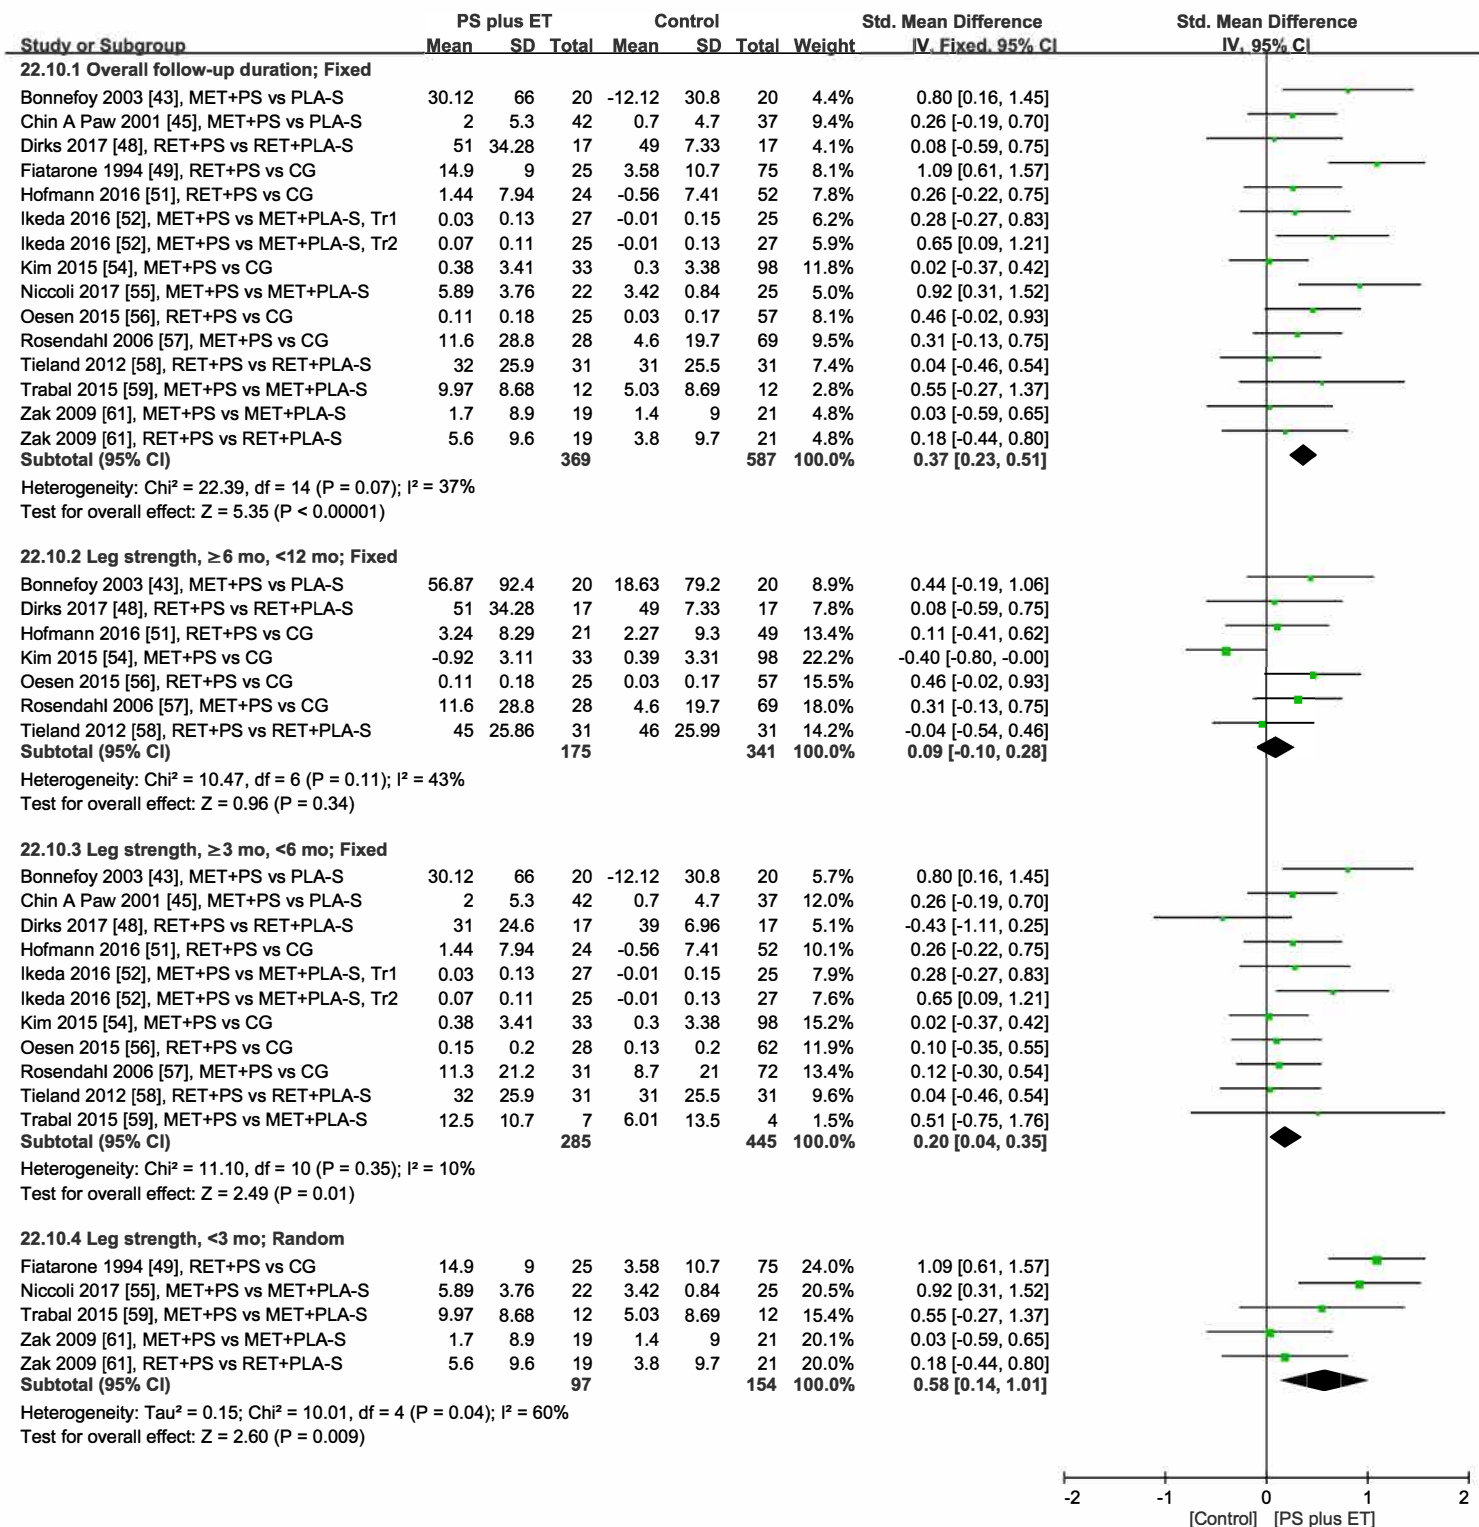

Figure S10. Forest plot summarizing effects of protein supplement (PS) plus exercise training (ET) on leg strength at an overall duration and each follow-up time point. The horizontal line links the lower and upper limits of the 95% CI of this effect. The combined effects are plotted using black diamonds. 95% CI = 95% confidence interval; Fixed = fixed-effects model; Std. = standard; IV = inverse variance; CG = control group; CogT = cognition training; Con = control; MET = multicomponent exercise training; PLA-S, placebo supplement; RET = resistance exercise training; Tr = treatment session.



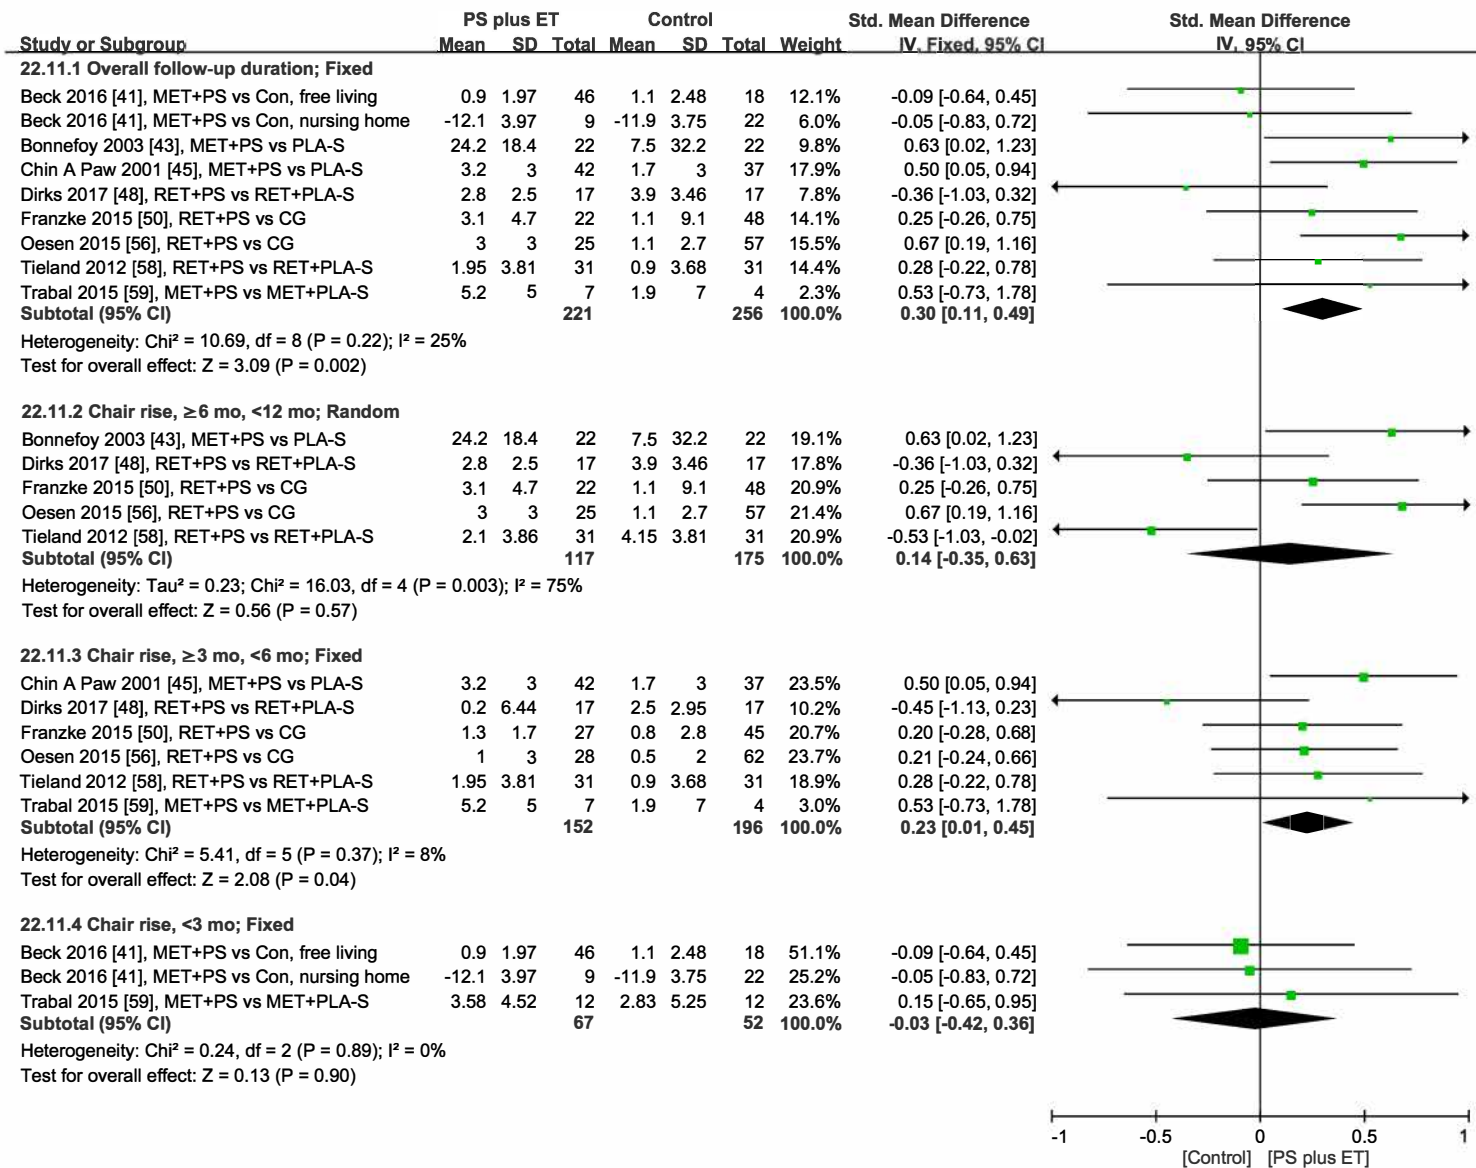

Figure S11. Forestplot summarizing effects of protein supplement (PS) plus exercise training (ET) on chair rise at an overall duration and each follow-up time point. The horizontal line links the lower and upper limits of the 95% CI of this effect. The combined effects are plotted using black diamonds. 95% CI = 95% confidence interval; Fixed = fixed-effects model; Random = random-effects model; Std. = standard; IV = inverse variance; CG = control group; Con = control; MET = multicomponent exercise training; PLA-S, placebo supplement; RET = resistance exercise training.

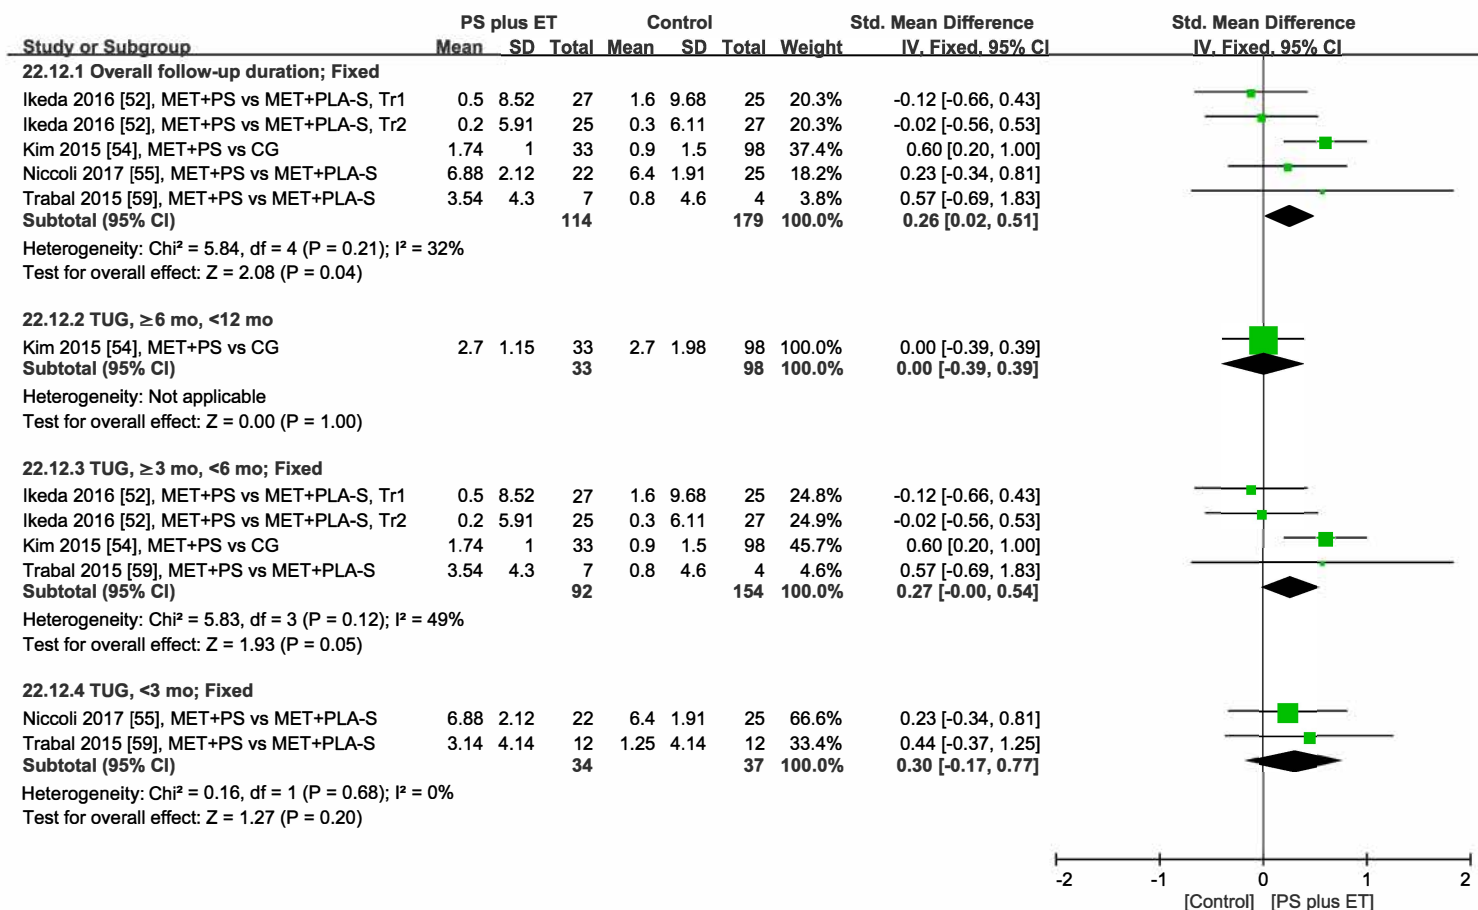

Figure S12. Forest plot summarizing effects of protein supplement (PS) plus exercise training (ET) on chair rise at an overall duration and each follow-up time point. The horizontal line links the lower and upper limits of the 95% CI of this effect. The combined effects are plotted using black diamonds. 95% CI = 95% confidence interval; Fixed = fixed-effects model; Random = random-effects model; Std. = standard; IV = inverse variance; CG = control group; Con = control; MET = multicomponent exercise training; PLA-S, placebo supplement; RET = resistance exercise training.

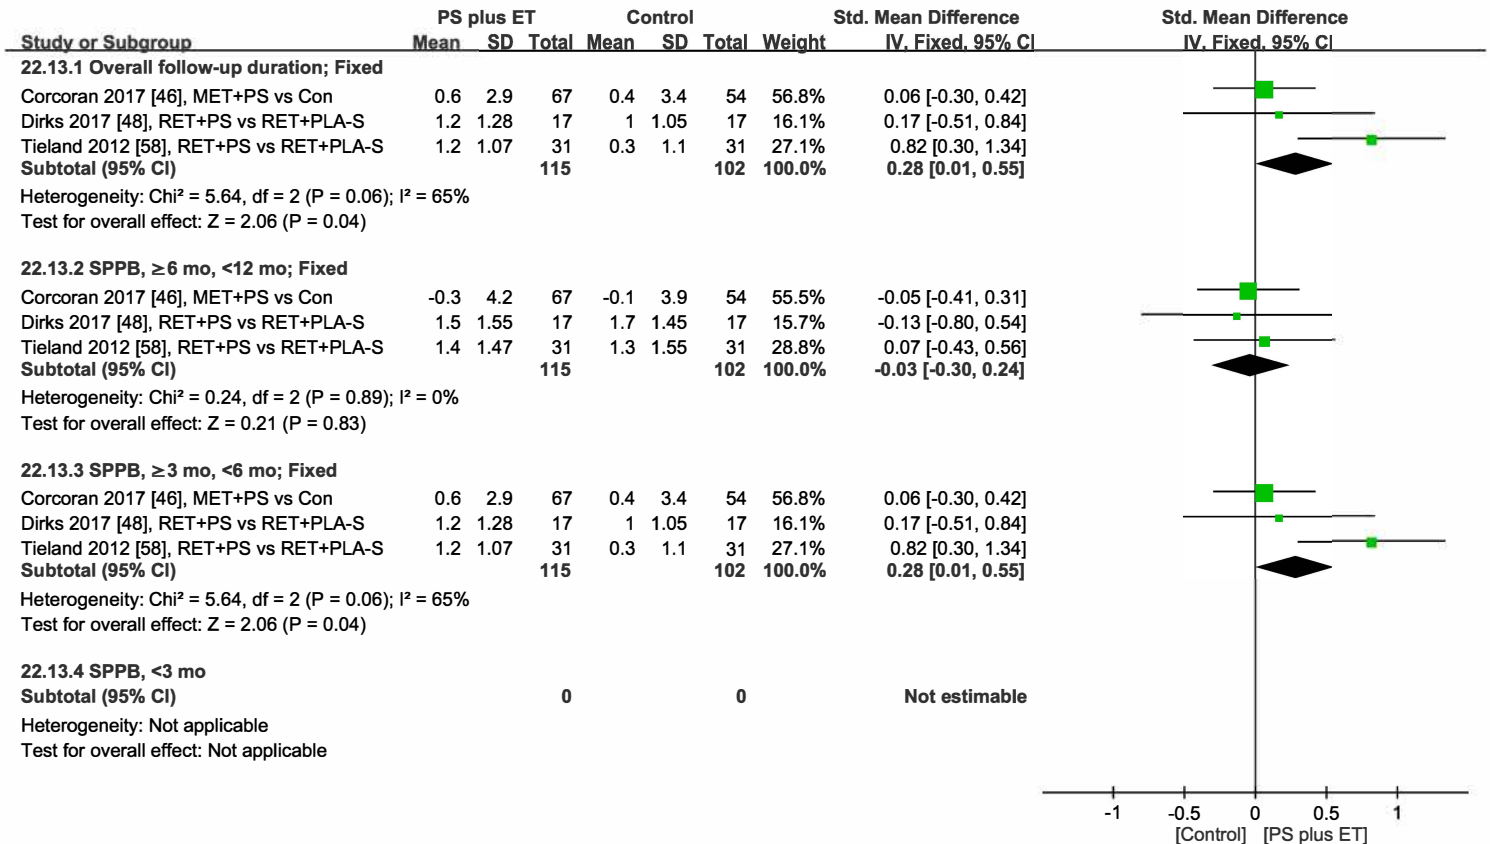

Figure S13. Forest plot summarizing effects of protein supplement (PS) plus exercise training (ET) on SPPB at an overall duration and each follow-up time point. The horizontal line links the lower and upper limits of the 95% CI of this effect. The combined effects are plotted using black diamonds. 95% CI = 95% confidence interval; Fixed = fixed-effects model; Random = random-effects model; Std. = standard; IV = inverse variance; CG = control group; Con = control; MET = multicomponent exercise training; PLA-S, placebo supplement; RET = resistance exercise training; SPPB = short physical performance battery.

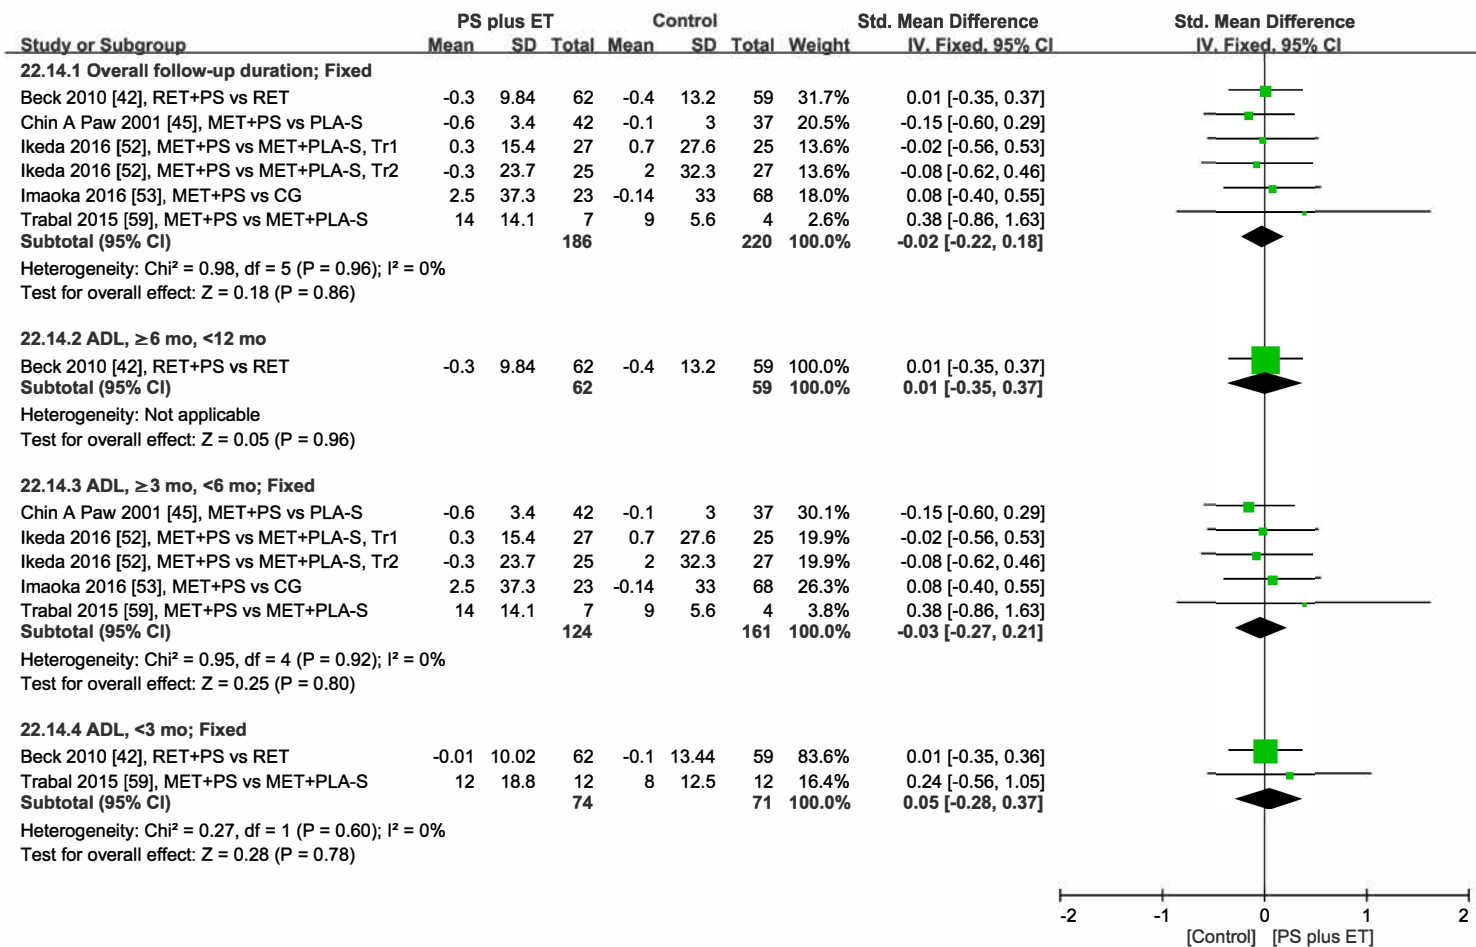

Figure S14. Forest plot summarizing effects of protein supplement (PS) plus exercise training (ET) on activities of daily living (ADL) at an overall duration and each follow-up time point. The horizontal line links the lower and upper limits of the 95% CI of this effect. The combined effects are plotted using black diamonds. 95% CI = 95% confidence interval; Fixed = fixed-effects model; Std. = standard; IV = inverse variance; CG = control group; Con = control; MET = multicomponent exercise training; PLA-S, placebo supplement; RET = resistance exercise training; Tr = treatment session.
